# Supplementary material for: Genome-wide association analysis for chronic venous disease identifies EFEMP1 and KCNH8 as susceptibility loci
Source: PubMed Central journal article supplement (PMC5379489; doi:10.1038/srep45652), 2017-04-04
Supplement: srep45652-s1.pdf [file srep45652-s1.pdf]

# SUPPLEMENTARY INFORMATION

for

## Genome-wide association analysis for chronic venous disease identifies *EFEMP1* and *KCNH8* as susceptibility loci

Eva Ellinghaus, PhD<sup>1,¶</sup>; David Ellinghaus, PhD<sup>1,¶,\*</sup>; Petra Krusche, MD<sup>2</sup>; Aljoscha Greiner, MD<sup>2</sup>; Claudia Schreiber, MD<sup>3</sup>; Susanna Nikolaus, MD<sup>3</sup>; Christian Gieger, PhD<sup>4</sup>; Konstantin Strauch, PhD<sup>4,5</sup>; Wolfgang Lieb, MD<sup>6</sup>; Philip Rosenstiel, MD<sup>1</sup>; Norbert Frings, MD<sup>2</sup>; Andreas Fiebig, PhD<sup>1</sup>; Stefan Schreiber, MD<sup>1,3</sup>; Andre Franke, PhD<sup>1</sup>

- 1 Institute of Clinical Molecular Biology, Christian-Albrechts-University of Kiel, 24105 Kiel, Germany
- 2 Capio Mosel-Eifel-Clinic, 56864 Bad Bertrich, Germany
- 3 Department of General Medicine, University Hospital Schleswig-Holstein, Campus Kiel, 24105 Kiel, Germany
- 4 Institute of Genetic Epidemiology, Helmholtz Zentrum München, German Research Center for Environmental Health, 85764 Neuherberg, Germany
- 5 Institute of Medical Informatics, Biometry and Epidemiology, Chair of Genetic Epidemiology, Ludwig-Maximilians-Universität, 80539 Munich, Germany
- 6 PopGen Biobank, Institute of Epidemiology, University Hospital Schleswig-Holstein, 24105 Kiel, Germany

¶These authors contributed equally to this work

\*To whom correspondence should be addressed:

Dr. David Ellinghaus

Institute of Clinical Molecular Biology

Christian-Albrechts-University of Kiel

University Hospital Schleswig Holstein · Campus Kiel

Rosalind-Franklin-Str. 12 · 24105 Kiel, Germany

Delivery address: Am Botanischen Garten 11, 24118 Kiel, Germany

Phone: +49 431 500 15131

Fax: +49 431 500 15178

eMail: [d.ellinghaus@ikmb.uni-kiel.de](mailto:d.ellinghaus@ikmb.uni-kiel.de)

## Supplementary Tables

### Supplementary Table 1. Case/control panels used in the analysis.

**Panel A:** German discovery panel (GWAS) after quality control. ‘Group’ refers to the scientific group that provided samples.

| Country | Group                             | No. Cases<br>(C2, C3, C4) | No.<br>Controls | Platform            |
|---------|-----------------------------------|---------------------------|-----------------|---------------------|
| Germany | Capio Mosel-Eifel-Clinic          | 323                       | -               | Affymetrix 5.0      |
|         | CAU Kiel & PopGen                 | -                         | 1228            | Affymetrix 6.0      |
|         | KORA S3 (Helmholtz Center Munich) | -                         | 1773            | Affymetrix 500k Set |
|         | KORA S4 (Helmholtz Center Munich) | -                         | 1618            | Affymetrix 6.0      |
| Total   |                                   | 323                       | 4619            |                     |

**Panel B:** Stage one replication in German population after quality control.

| Country | Group                    | No. Cases<br>(C2, C3, C4) | No. Controls | Platform          |
|---------|--------------------------|---------------------------|--------------|-------------------|
| Germany | Capio Mosel-Eifel-Clinic | 1258                      | -            | Sequenom & TaqMan |
|         | CAU Kiel & PopGen        | -                         | 1925         |                   |

**Panel C:** Stage two replication in German population after quality control.

| Country | Group                    | No. Cases<br>(C2, C3, C4) | No. Controls | Platform |
|---------|--------------------------|---------------------------|--------------|----------|
| Germany | Capio Mosel-Eifel-Clinic | 688                       | -            | TaqMan   |
|         | CAU Kiel & PopGen        | -                         | 1221         |          |

**Supplementary Table 2. Results of replication stage one genotyping and association testing of 70 SNPs in an independent German panel of 1,258 CVD cases and 1,925 controls (panel B, Supplementary Table 1).**

| CHR | BP          | SNP        | P <sub>GWAS</sub>      | A1 | A2 | AF <sub>cases</sub> | AF <sub>controls</sub> | P                     | OR   | 95% CI    |
|-----|-------------|------------|------------------------|----|----|---------------------|------------------------|-----------------------|------|-----------|
| 1   | 50,336,554  | rs4285748  | 1.82×10 <sup>-4</sup>  | T  | C  | 0.05                | 0.04                   | 0.46                  | 1.10 | 0.86-1.39 |
| 1   | 76,441,522  | rs17097780 | 2.37×10 <sup>-7</sup>  | T  | A  | 0.09                | 0.08                   | 0.27                  | 1.11 | 0.92-1.33 |
| 2   | 53,885,058  | rs11682721 | 1.08×10 <sup>-4</sup>  | G  | A  | 0.4                 | 0.42                   | 0.17                  | 0.93 | 0.84-1.03 |
| 2   | 56,095,994  | rs17278665 | 5.18×10 <sup>-5</sup>  | G  | C  | 0.18                | 0.14                   | 8.47×10 <sup>-5</sup> | 1.32 | 1.15-1.51 |
| 2   | 106,373,169 | rs13028719 | 9.23×10 <sup>-4</sup>  | C  | T  | 0.28                | 0.28                   | 0.48                  | 0.96 | 0.86-1.08 |
| 2   | 128,309,469 | rs12464981 | 3.05×10 <sup>-4</sup>  | G  | C  | 0.41                | 0.40                   | 0.27                  | 1.06 | 0.96-1.17 |
| 2   | 142,027,067 | rs3856359  | 3.62×10 <sup>-4</sup>  | T  | A  | 0.08                | 0.07                   | 0.09                  | 1.18 | 0.98-1.43 |
| 2   | 154,163,944 | rs1347927  | 7.65×10 <sup>-5</sup>  | G  | A  | 0.39                | 0.35                   | 3.29×10 <sup>-3</sup> | 1.17 | 1.05-1.30 |
| 2   | 218,588,976 | rs6436007  | 1.33×10 <sup>-7</sup>  | A  | G  | 0.10                | 0.10                   | 0.42                  | 1.07 | 0.91-1.27 |
| 2   | 223,658,198 | rs11689692 | 1.04×10 <sup>-4</sup>  | A  | T  | 0.13                | 0.13                   | 0.81                  | 1.02 | 0.88-1.18 |
| 3   | 19,334,695  | rs727139   | 1.69×10 <sup>-4</sup>  | G  | A  | 0.18                | 0.22                   | 4.54×10 <sup>-5</sup> | 0.77 | 0.67-0.87 |
| 3   | 65,638,580  | rs1499496  | 8.85×10 <sup>-5</sup>  | C  | T  | 0.07                | 0.07                   | 0.72                  | 1.04 | 0.85-1.27 |
| 3   | 73,379,546  | rs12637430 | 1.13×10 <sup>-4</sup>  | C  | T  | 0.23                | 0.21                   | 0.10                  | 1.11 | 0.98-1.25 |
| 4   | 30,949,606  | rs4692493  | 8.89×10 <sup>-4</sup>  | A  | T  | 0.47                | 0.46                   | 0.76                  | 1.02 | 0.92-1.12 |
| 4   | 107,359,768 | rs6819528  | 7.29×10 <sup>-5</sup>  | T  | G  | 0.47                | 0.50                   | 0.05                  | 0.90 | 0.82-1.00 |
| 4   | 110,499,958 | rs13118855 | 1.18×10 <sup>-4</sup>  | G  | A  | 0.10                | 0.11                   | 0.10                  | 0.87 | 0.74-1.03 |
| 4   | 110,571,210 | rs1029453  | 2.42×10 <sup>-4</sup>  | A  | C  | 0.10                | 0.12                   | 0.07                  | 0.86 | 0.73-1.01 |
| 5   | 26,963,586  | rs2127426  | 1.03×10 <sup>-7</sup>  | C  | G  | 0.17                | 0.17                   | 0.45                  | 0.95 | 0.83-1.09 |
| 5   | 64,495,058  | rs1895431  | 4.90×10 <sup>-4</sup>  | T  | C  | 0.32                | 0.33                   | 0.38                  | 0.95 | 0.86-1.06 |
| 5   | 91,049,451  | rs331385   | 6.09×10 <sup>-5</sup>  | G  | A  | 0.45                | 0.42                   | 0.01                  | 1.15 | 1.03-1.27 |
| 5   | 115,800,559 | rs10077720 | 4.94×10 <sup>-5</sup>  | A  | G  | 0.10                | 0.08                   | 0.01                  | 1.26 | 1.06-1.51 |
| 5   | 127,684,411 | rs11241956 | 1.97×10 <sup>-4</sup>  | G  | A  | 0.31                | 0.34                   | 4.64×10 <sup>-3</sup> | 0.86 | 0.77-0.95 |
| 5   | 171,128,464 | rs6555969  | 3.88×10 <sup>-4</sup>  | T  | C  | 0.33                | 0.33                   | 0.60                  | 1.03 | 0.92-1.15 |
| 6   | 2,623,930   | rs9503233  | 5.24×10 <sup>-4</sup>  | A  | G  | 0.21                | 0.21                   | 0.45                  | 0.95 | 0.84-1.08 |
| 6   | 33,020,842  | rs3128953  | 1.20×10 <sup>-12</sup> | A  | G  | 0.24                | 0.22                   | 0.07                  | 1.12 | 0.99-1.27 |
| 6   | 55,347,790  | rs9396099  | 8.13×10 <sup>-4</sup>  | T  | C  | 0.26                | 0.23                   | 1.93×10 <sup>-3</sup> | 1.20 | 1.07-1.35 |
| 7   | 24,005,443  | rs17148598 | 3.91×10 <sup>-7</sup>  | G  | A  | 0.08                | 0.08                   | 0.57                  | 0.95 | 0.78-1.14 |
| 7   | 26,891,016  | rs2030136  | 3.93×10 <sup>-4</sup>  | C  | T  | 0.26                | 0.22                   | 6.98×10 <sup>-5</sup> | 1.27 | 1.13-1.43 |
| 7   | 31,445,598  | rs1860793  | 5.99×10 <sup>-4</sup>  | C  | T  | 0.34                | 0.36                   | 0.04                  | 0.89 | 0.80-0.99 |
| 7   | 47,445,812  | rs834601   | 3.95×10 <sup>-4</sup>  | C  | T  | 0.49                | 0.50                   | 0.32                  | 0.95 | 0.86-1.05 |
| 7   | 52,104,548  | rs10278047 | 1.76×10 <sup>-4</sup>  | T  | C  | 0.22                | 0.25                   | 3.03×10 <sup>-3</sup> | 0.83 | 0.74-0.94 |
| 7   | 77,686,838  | rs6958027  | 3.43×10 <sup>-4</sup>  | T  | G  | 0.44                | 0.42                   | 0.30                  | 1.06 | 0.95-1.17 |
| 7   | 77,868,102  | rs10953499 | 6.86×10 <sup>-5</sup>  | A  | G  | 0.17                | 0.19                   | 0.07                  | 0.89 | 0.78-1.01 |
| 7   | 83,134,459  | rs11982066 | 4.28×10 <sup>-4</sup>  | C  | T  | 0.41                | 0.43                   | 0.12                  | 0.92 | 0.83-1.02 |
| 7   | 115,708,814 | rs12532028 | 8.00×10 <sup>-6</sup>  | A  | C  | 0.10                | 0.09                   | 0.58                  | 1.05 | 0.88-1.24 |
| 7   | 153,638,248 | rs6973850  | 1.59×10 <sup>-7</sup>  | T  | C  | 0.12                | 0.11                   | 0.36                  | 1.08 | 0.92-1.26 |
| 8   | 59,857,097  | rs16924316 | 1.58×10 <sup>-4</sup>  | C  | T  | 0.12                | 0.13                   | 0.20                  | 0.90 | 0.77-1.05 |

|    |             |            |                       |   |   |      |      |                       |      |           |
|----|-------------|------------|-----------------------|---|---|------|------|-----------------------|------|-----------|
| 8  | 73,409,704  | rs12547029 | 1.25×10 <sup>-4</sup> | T | C | 0.42 | 0.42 | 0.91                  | 0.99 | 0.90-1.10 |
| 8  | 73,419,786  | rs1346958  | 5.39×10 <sup>-5</sup> | A | C | 0.38 | 0.38 | 0.93                  | 1.01 | 0.91-1.11 |
| 8  | 114,888,083 | rs12334329 | 3.06×10 <sup>-7</sup> | A | G | 0.13 | 0.13 | 0.95                  | 1.01 | 0.87-1.17 |
| 8  | 133,247,788 | rs4736558  | 7.37×10 <sup>-4</sup> | T | A | 0.24 | 0.24 | 0.98                  | 1.00 | 0.89-1.12 |
| 9  | 8,117,601   | rs4742453  | 7.97×10 <sup>-4</sup> | A | G | 0.12 | 0.12 | 0.44                  | 1.06 | 0.91-1.24 |
| 9  | 22,740,232  | rs7872081  | 5.30×10 <sup>-6</sup> | A | G | 0.06 | 0.05 | 0.18                  | 1.16 | 0.94-1.44 |
| 9  | 28,299,438  | rs7855717  | 1.30×10 <sup>-4</sup> | C | T | 0.29 | 0.30 | 0.55                  | 0.97 | 0.87-1.08 |
| 9  | 71,198,014  | rs17479566 | 3.11×10 <sup>-5</sup> | T | C | 0.20 | 0.23 | 3.71×10 <sup>-3</sup> | 0.83 | 0.74-0.94 |
| 10 | 6,677,767   | rs10795331 | 7.79×10 <sup>-5</sup> | T | C | 0.46 | 0.47 | 0.53                  | 0.97 | 0.88-1.07 |
| 10 | 95,116,029  | rs787629   | 1.20×10 <sup>-4</sup> | A | C | 0.27 | 0.27 | 0.78                  | 1.02 | 0.91-1.14 |
| 10 | 128,526,537 | rs10794128 | 4.66×10 <sup>-5</sup> | C | T | 0.35 | 0.33 | 0.03                  | 1.13 | 1.01-1.25 |
| 11 | 63,948,354  | rs4980525  | 5.14×10 <sup>-4</sup> | C | T | 0.46 | 0.47 | 0.55                  | 0.97 | 0.88-1.07 |
| 11 | 104,140,745 | rs7950244  | 4.33×10 <sup>-5</sup> | C | A | 0.07 | 0.07 | 0.24                  | 0.89 | 0.73-1.08 |
| 12 | 27,031,461  | rs7306179  | 5.20×10 <sup>-4</sup> | A | T | 0.38 | 0.39 | 0.23                  | 0.94 | 0.85-1.04 |
| 12 | 101,637,505 | rs10778104 | 1.56×10 <sup>-4</sup> | A | C | 0.40 | 0.37 | 0.06                  | 1.10 | 1.00-1.22 |
| 12 | 106,299,118 | rs7957583  | 8.97×10 <sup>-4</sup> | A | T | 0.38 | 0.40 | 0.16                  | 0.93 | 0.84-1.03 |
| 12 | 114,713,898 | rs7962292  | 9.98×10 <sup>-4</sup> | T | C | 0.35 | 0.35 | 0.82                  | 1.01 | 0.91-1.13 |
| 13 | 19,875,086  | rs547308   | 1.40×10 <sup>-4</sup> | C | T | 0.41 | 0.41 | 0.94                  | 1.00 | 0.90-1.10 |
| 13 | 24,208,829  | rs7987909  | 6.30×10 <sup>-4</sup> | G | A | 0.11 | 0.11 | 0.85                  | 0.98 | 0.84-1.16 |
| 15 | 30,137,080  | rs1403253  | 1.03×10 <sup>-4</sup> | G | A | 0.15 | 0.13 | 0.13                  | 1.12 | 0.97-1.29 |
| 15 | 70,817,223  | rs8033107  | 3.11×10 <sup>-4</sup> | T | C | 0.23 | 0.21 | 0.21                  | 1.08 | 0.96-1.22 |
| 17 | 5,391,690   | rs2309399  | 9.81×10 <sup>-4</sup> | A | G | 0.43 | 0.44 | 0.45                  | 0.96 | 0.87-1.07 |
| 17 | 68,256,295  | rs236562   | 3.02×10 <sup>-5</sup> | G | A | 0.41 | 0.42 | 0.39                  | 0.96 | 0.86-1.06 |
| 18 | 3,656,488   | rs1791398  | 8.30×10 <sup>-4</sup> | G | A | 0.21 | 0.21 | 0.43                  | 0.95 | 0.84-1.08 |
| 18 | 5,620,114   | rs12455403 | 6.81×10 <sup>-6</sup> | C | T | 0.18 | 0.18 | 0.55                  | 0.96 | 0.84-1.10 |
| 18 | 28,619,690  | rs276931   | 9.36×10 <sup>-4</sup> | G | A | 0.31 | 0.33 | 0.15                  | 0.92 | 0.83-1.03 |
| 19 | 3,709,018   | rs570896   | 6.17×10 <sup>-4</sup> | G | C | 0.31 | 0.31 | 0.92                  | 1.01 | 0.90-1.12 |
| 19 | 16,337,588  | rs10469462 | 1.04×10 <sup>-4</sup> | C | T | 0.17 | 0.20 | 0.02                  | 0.86 | 0.75-0.98 |
| 19 | 16,343,847  | rs12984337 | 6.79×10 <sup>-5</sup> | T | A | 0.28 | 0.28 | 0.92                  | 0.99 | 0.89-1.11 |
| 19 | 16,368,528  | rs4808478  | 2.98×10 <sup>-5</sup> | A | C | 0.26 | 0.28 | 0.08                  | 0.90 | 0.81-1.01 |
| 20 | 2,100,348   | rs6112914  | 9.70×10 <sup>-4</sup> | A | G | 0.20 | 0.20 | 0.48                  | 0.96 | 0.84-1.08 |
| 20 | 61,018,265  | rs6061531  | 4.34×10 <sup>-7</sup> | C | T | 0.14 | 0.14 | 0.59                  | 1.04 | 0.90-1.20 |
| 21 | 39,284,835  | rs2836050  | 2.18×10 <sup>-5</sup> | T | C | 0.20 | 0.20 | 0.73                  | 1.02 | 0.90-1.16 |

**CHR:** chromosome; **BP:** position (NCBI build 37/hg19 coordinates) of SNP marker; **SNP:** SNP rs-id (if available from dbSNP130); **P<sub>GWAS</sub>:** *P*-value in the initial genome-wide phase; **A1:** minor allele; **A2:** major allele; **AF<sub>cases</sub>:** allele frequency of minor allele A1 in cases; **AF<sub>controls</sub>:** allele frequency of minor allele A1 in controls; **P:** *P*-value; **OR:** corresponding odds ratio and **95% CI:** 95% confidence interval with respect to minor allele.

**Supplementary Table 3. Results of replication stage two genotyping and association testing of 3 SNPs in an independent German panel of 688 CVD cases and 1,221 controls (panel C, Supplementary Table 1).**

| CHR | BP         | SNP        | P <sub>GWAS</sub>     | A1 | A2 | AF <sub>cases</sub> | AF <sub>controls</sub> | P                     | OR   | 95% CI    |
|-----|------------|------------|-----------------------|----|----|---------------------|------------------------|-----------------------|------|-----------|
| 2   | 56,095,994 | rs17278665 | 5.18×10 <sup>-5</sup> | G  | C  | 0.17                | 0.15                   | 0.07                  | 1.18 | 0.99-1.41 |
| 3   | 19,334,695 | rs727139   | 1.69×10 <sup>-4</sup> | G  | A  | 0.16                | 0.21                   | 1.53×10 <sup>-4</sup> | 0.72 | 0.60-0.85 |
| 7   | 26,891,016 | rs2030136  | 3.93×10 <sup>-4</sup> | C  | T  | 0.26                | 0.24                   | 0.17                  | 1.11 | 0.95-1.30 |

**CHR:** chromosome; **BP:** position (NCBI build 37/hg19 coordinates) of SNP marker; **SNP:** SNP rs-id (if available from dbSNP130); **P<sub>GWAS</sub>:** *P*-value in the initial genome-wide phase; **A1:** minor allele; **A2:** major allele; **AF<sub>cases</sub>:** allele frequency of minor allele A1 in cases; **AF<sub>controls</sub>:** allele frequency of minor allele A1 in controls; **P:** *P*-value; **OR:** corresponding odds ratio and **95% CI:** 95% confidence interval with respect to minor allele.

**Supplementary Table 4. Results of association testing of 3 SNPs in panel B and C with adjustments made for sex, age at ascertainment and body mass index (BMI) if available.** No notably different results were obtained in the sex-, age- and BMI-adjusted analyses.

| CHR | BP         | SNP        | A1 | A2 | P                     | panel B       |           |                       |      | panel B & C           |      |                    |                       |      |
|-----|------------|------------|----|----|-----------------------|---------------|-----------|-----------------------|------|-----------------------|------|--------------------|-----------------------|------|
|     |            |            |    |    |                       | no adjustment |           | BMI* adjusted         | P    | no adjustment         |      | sex & age adjusted |                       |      |
|     |            |            |    |    |                       | OR            | 95% CI    | P                     | OR   | P                     | OR   | 95% CI             | P                     | OR   |
| 2   | 56,095,994 | rs17278665 | G  | C  | 8.47×10 <sup>-5</sup> | 1.32          | 1.15-1.51 | 7.81×10 <sup>-5</sup> | 1.32 | 2.59×10 <sup>-5</sup> | 1.26 | 1.13-1.41          | 4.54×10 <sup>-6</sup> | 1.32 |
| 3   | 19,334,695 | rs727139   | G  | A  | 4.54×10 <sup>-5</sup> | 0.77          | 0.67-0.87 | 6.33×10 <sup>-5</sup> | 0.77 | 3.39×10 <sup>-8</sup> | 0.75 | 0.68-0.83          | 4.99×10 <sup>-8</sup> | 0.74 |
| 7   | 26,891,016 | rs2030136  | C  | T  | 6.98×10 <sup>-5</sup> | 1.27          | 1.13-1.43 | 2.18×10 <sup>-4</sup> | 1.25 | 6.84×10 <sup>-5</sup> | 1.21 | 1.10-1.33          | 2.53×10 <sup>-5</sup> | 1.24 |

**CHR:** chromosome; **BP:** position (NCBI build 37/hg19 coordinates) of SNP marker; **SNP:** SNP rs-id (if available from dbSNP130); **A1:** minor allele; **A2:** major allele; **P/OR:** *P*-value, corresponding odds ratio and **95% CI:** 95% confidence interval with respect to minor allele.

\*BMI was available for the cases of panel B and C, but only for the controls of panel B.

**Supplementary Table 5. Functional annotation of three newly identified disease associations and all variants in high LD ( $r^2 > 0.8$ ) with these variants.** All variants were annotated using CADD<sup>1</sup> v1.3 (GRCh37/hg19;), fathmm<sup>2</sup> v2.3, MutationTaster<sup>3</sup> (NCBI build 37, Ensemble 69) and HaploReg<sup>4</sup> v4.1 to determine position annotations, including the closest gene, the effect on SNPs on splice sites and functional consequences (**Methods**).











**SNP:** SNP rs ID; **CHR:** Chromosome; **BP:** position (NCBI build 37/hg19 coordinates) of SNP marker; **Ref:** reference allele; **Anc:** ancestral allele; **Alt:** observed allele; **Type:** event type (“SNV”: single nucleotide variant, ‘DEL’: deletion, ‘INS’: insertion); **AnnoType:** ‘CodingTranscript’, ‘Intergenic’, ‘MotifFeature’, ‘NonCodingTranscript’, ‘RegulatoryFeature’, ‘Transcript’; **Consequence:** ‘3PRIME\_UTR’, ‘5PRIME\_UTR’, ‘DOWNSTREAM’, ‘INTERGENIC’, ‘INTRONIC’, ‘NON\_SYNONYMOUS’, ‘SYNONYMOUS’, ‘REGULATORY’, ‘STOP\_GAINED’, ‘STOP\_LOST’, ‘SPLICE\_SITE’, ‘CANONCAL\_SPLICE’, ‘UPSTREAM’, ‘NONCODING\_CHANGE’; **GC:** percent GC in a window of +/- 75 bp; **CpG:** percent CpG in a window of +/-75 bp; **prPhCons:** primate PhastCons conservation score (excl. human); **mamPhCons:** mammalian PhastCons conservation score (excl. human); **verPhCons:** vertebrate PhastCons conservation score (excl. human); **priPhyloP:** primate PhyloP score (excl. human); **mamPhyloP:** mammalian PhyloP score (excl. human); **verPhyloP:** vertebrate PhyloP score (excl. human); **GerpN:** neutral evolution score defined by GERP++ (GERP: Genomic Evolutionary Rate Profiling); **GerpS:** rejected substitution score defined by GERP++; **GerpRS:** Gerp element score; **GerpRSpval:** Gerp element *P*-value ; **GeneName:** name of gene provided in ENSEMBL annotation; **Intron:** intron number/total number of introns; **Grantham:** Grantham score; **PolyPhenVal:** PolyPhen score; **SIFTval:** SIFT score; **RawScore:** raw CADD score. Raw values have relative meaning, with higher values indicating that a variant is more likely not to be observed and therefore more likely to have deleterious effects; **PHRED:** PHRED-like ( $-10 \times \log_{10}(\text{rank}/\text{total})$ ) scaled C-score. A scaled C-score of  $\geq 10$  indicates a prediction of the 10% most deleterious substitutions that you can do to the human genome, a score of  $\geq 20$  indicates the 1% most deleterious; **Non-Coding score:** predictions are given as *P*-values [0-1], values  $> 0.5$  are predicted to be deleterious, values  $< 0.5$  are predicted to be neutral/benign; **Non-Coding Groups:** non-coding predictor (for positions in intergenic regions, introns or non-coding genes) using a subset of 4 of these feature groups: A (46-Way Sequence Conservation based on multiple sequence alignment scores, at the nucleotide level, of 46 vertebrate genomes compared to the human genome), B (Histone Modifications based on ChIP-Seq peak calls for histone modifications), C (Transcription Factor Binding Sites (TFBS PeakSeq) based on PeakSeq peak calls for various transcription factors), D (Open Chromatin based on DNase-Seq peak calls); **pred\_index:** ‘disease causing’: probably deleterious, ‘disease causing automatic’: known to be deleterious, ‘polymorphism’: probably harmless, ‘polymorphism automatic’: known to be harmless; **probability:** probability of the prediction, i.e. a value close to 1 indicates a high security of the prediction.; **features:** summary of

affected features; **splice site - effect**: donor/acceptor splice site increased/decreased/gained/lost; **splice site - gDNA position**: gDNA position of splice site; **splice site - score**: confidence score for wild-type (wt) and/or mutated (mu) splice site as generated by NNSplice<sup>5</sup>; **Sequence constraint by GERP**: ‘yes’ indicates that the region is called as constrained (vs. non-constrained) by the mammalian conservation algorithm GERP; **Sequence constraint by SiPhy**: ‘yes’ indicates that the region is called as constrained (vs. non-constrained) by the mammalian conservation algorithm SiPhy-omega; **NHGRI/EBI GWAS hits**: GWAS results (PMID, phenotype, *P*-value) obtained from the NHGRI catalog (accessed October 31, 2015); **RefSeq genes**: RefSeq genes from the UCSC Genome Browser; **dbSNP func annot**: annotations of functional consequences from dbSNP.

**Supplementary Table 6. List of known eQTLs for the three newly identified disease associations and all variants in high LD ( $r^2 > 0.8$ ) with these variants.** All variants were annotated using HaploReg<sup>4</sup> v4.1 to identify SNPs with an effect on gene expression (see **Methods**).

|            |     |            | HaploReg          |                                                 |                         |
|------------|-----|------------|-------------------|-------------------------------------------------|-------------------------|
| SNP        | CHR | BP         | eQTL resource id* | Selected eQTL hits                              | P-val                   |
| rs17278665 | 2   | 56,095,994 | GTEEx2015_v6      | Skin Sun Exposed Lower leg, EFEMP1              | 2.25×10 <sup>-6</sup>   |
|            |     |            | Hao2012           | Lung, EFEMP1                                    | 3.45×10 <sup>-7</sup>   |
| rs11899888 | 2   | 56,102,744 | .                 | .                                               | .                       |
| rs13064845 | 3   | 19,312,697 | .                 | .                                               | .                       |
| rs727139   | 3   | 19,334,695 | .                 | .                                               | .                       |
| rs212838   | 7   | 26,698,194 | GTEEx2015_v6      | Thyroid, HOXA5                                  | 2.26×10 <sup>-5</sup>   |
|            |     |            | GTEEx2015_v6      | Whole Blood, SKAP2                              | 4.26×10 <sup>-7</sup>   |
|            |     |            | Lappalainen2013   | Lymphoblastoid EUR exonlevel, ENSG00000005020.8 | 8.82×10 <sup>-7</sup>   |
|            |     |            | Westra2013        | Whole Blood, SKAP2                              | 2.23×10 <sup>-122</sup> |
| rs3757654  | 7   | 26,711,104 | GTEEx2015_v6      | Thyroid, HOXA5                                  | 1.20×10 <sup>-5</sup>   |
|            |     |            | GTEEx2015_v6      | Whole Blood, SKAP2                              | 3.47×10 <sup>-7</sup>   |
|            |     |            | Lappalainen2013   | Lymphoblastoid EUR exonlevel, ENSG00000005020.8 | 3.45×10 <sup>-6</sup>   |
|            |     |            | Westra2013        | Whole Blood, SKAP2                              | 4.57×10 <sup>-119</sup> |
| rs212848   | 7   | 26,722,155 | GTEEx2015_v6      | Thyroid, HOXA5                                  | 1.28×10 <sup>-5</sup>   |
|            |     |            | GTEEx2015_v6      | Whole Blood, SKAP2                              | 3.41×10 <sup>-7</sup>   |
|            |     |            | Lappalainen2013   | Lymphoblastoid EUR exonlevel, ENSG00000005020.8 | 1.44×10 <sup>-6</sup>   |
| rs212850   | 7   | 26,724,279 | GTEEx2015_v6      | Thyroid, HOXA5                                  | 1.38×10 <sup>-5</sup>   |
|            |     |            | GTEEx2015_v6      | Whole Blood, SKAP2                              | 3.80×10 <sup>-7</sup>   |
|            |     |            | Lappalainen2013   | Lymphoblastoid EUR exonlevel, ENSG00000005020.8 | 1.37×10 <sup>-6</sup>   |
|            |     |            | Westra2013        | Whole Blood, SKAP2                              | 9.41×10 <sup>-123</sup> |
| rs212856   | 7   | 26,729,205 | GTEEx2015_v6      | Thyroid, HOXA5                                  | 1.41×10 <sup>-5</sup>   |
|            |     |            | GTEEx2015_v6      | Whole Blood, SKAP2                              | 3.89×10 <sup>-7</sup>   |
|            |     |            | Lappalainen2013   | Lymphoblastoid EUR exonlevel, ENSG00000005020.8 | 1.34×10 <sup>-6</sup>   |
| rs212857   | 7   | 26,730,200 | GTEEx2015_v6      | Thyroid, HOXA5                                  | 1.23×10 <sup>-5</sup>   |
|            |     |            | GTEEx2015_v6      | Whole Blood, SKAP2                              | 7.76×10 <sup>-7</sup>   |
|            |     |            | Lappalainen2013   | Lymphoblastoid EUR exonlevel, ENSG00000005020.8 | 1.38×10 <sup>-6</sup>   |
|            |     |            | Westra2013        | Whole Blood, SKAP2                              | 2.28×10 <sup>-122</sup> |
| rs4719877  | 7   | 26,736,220 | GTEEx2015_v6      | Thyroid, HOXA5                                  | 1.31×10 <sup>-5</sup>   |
|            |     |            | GTEEx2015_v6      | Whole Blood, SKAP2                              | 3.44×10 <sup>-7</sup>   |
|            |     |            | Lappalainen2013   | Lymphoblastoid EUR exonlevel, ENSG00000005020.8 | 1.16×10 <sup>-6</sup>   |
|            |     |            | Westra2013        | Whole Blood, SKAP2                              | 1.87×10 <sup>-122</sup> |
| rs6461962  | 7   | 26,746,304 | GTEEx2015_v6      | Thyroid, HOXA5                                  | 1.41×10 <sup>-5</sup>   |
|            |     |            | GTEEx2015_v6      | Whole Blood, SKAP2                              | 6.87×10 <sup>-7</sup>   |
|            |     |            | Lappalainen2013   | Lymphoblastoid EUR exonlevel, ENSG00000005020.8 | 1.89×10 <sup>-6</sup>   |
|            |     |            | Westra2013        | Whole Blood, SKAP2                              | 6.70×10 <sup>-123</sup> |
| rs6972378  | 7   | 26,753,074 | GTEEx2015_v6      | Thyroid, HOXA5                                  | 1.38×10 <sup>-5</sup>   |
|            |     |            | GTEEx2015_v6      | Whole Blood, SKAP2                              | 5.77×10 <sup>-7</sup>   |
|            |     |            | Lappalainen2013   | Lymphoblastoid EUR exonlevel, ENSG00000005020.8 | 1.75×10 <sup>-6</sup>   |
|            |     |            | Westra2013        | Whole Blood, SKAP2                              | 2.32×10 <sup>-123</sup> |
| rs6951065  | 7   | 26,756,162 | GTEEx2015_v6      | Thyroid, HOXA5                                  | 1.27×10 <sup>-5</sup>   |
|            |     |            | GTEEx2015_v6      | Whole Blood, SKAP2                              | 3.51×10 <sup>-7</sup>   |
|            |     |            | Lappalainen2013   | Lymphoblastoid EUR exonlevel, ENSG00000005020.8 | 1.80×10 <sup>-6</sup>   |
|            |     |            | Westra2013        | Whole Blood, SKAP2                              | 6.91×10 <sup>-124</sup> |
| rs6964817  | 7   | 26,756,424 | GTEEx2015_v6      | Thyroid, HOXA5                                  | 1.27×10 <sup>-5</sup>   |
|            |     |            | GTEEx2015_v6      | Whole Blood, SKAP2                              | 3.49×10 <sup>-7</sup>   |
|            |     |            | Lappalainen2013   | Lymphoblastoid EUR exonlevel, ENSG00000005020.8 | 1.67×10 <sup>-6</sup>   |
|            |     |            | Westra2013        | Whole Blood, SKAP2                              | 6.91×10 <sup>-124</sup> |
| rs2106905  | 7   | 26,766,851 | GTEEx2015_v6      | Thyroid, HOXA5                                  | 1.22×10 <sup>-5</sup>   |
|            |     |            | GTEEx2015_v6      | Whole Blood, SKAP2                              | 2.44×10 <sup>-7</sup>   |
|            |     |            | Lappalainen2013   | Lymphoblastoid EUR exonlevel, ENSG00000005020.8 | 1.41×10 <sup>-6</sup>   |
|            |     |            | Westra2013        | Whole Blood, SKAP2                              | 1.82×10 <sup>-120</sup> |
| rs6461963  | 7   | 26,772,491 | GTEEx2015_v6      | Thyroid, HOXA5                                  | 1.22×10 <sup>-5</sup>   |
|            |     |            | GTEEx2015_v6      | Whole Blood, SKAP2                              | 2.43×10 <sup>-7</sup>   |
|            |     |            | Lappalainen2013   | Lymphoblastoid EUR exonlevel, ENSG00000005020.8 | 1.77×10 <sup>-6</sup>   |
|            |     |            | Westra2013        | Whole Blood, SKAP2                              | 2.30×10 <sup>-126</sup> |

|             |   |            |                 |                                                 |                         |
|-------------|---|------------|-----------------|-------------------------------------------------|-------------------------|
| rs4722630   | 7 | 26,773,364 | GTEEx2015_v6    | Thyroid, HOXA5                                  | 1.22×10 <sup>-5</sup>   |
|             |   |            | GTEEx2015_v6    | Whole Blood, SKAP2                              | 2.43×10 <sup>-7</sup>   |
|             |   |            | Lappalainen2013 | Lymphoblastoid EUR exonlevel, ENSG00000005020.8 | 2.19×10 <sup>-6</sup>   |
|             |   |            | Westra2013      | Whole Blood, SKAP2                              | 3.60×10 <sup>-126</sup> |
| rs6971397   | 7 | 26,782,564 | GTEEx2015_v6    | Thyroid, HOXA5                                  | 1.18×10 <sup>-5</sup>   |
|             |   |            | GTEEx2015_v6    | Whole Blood, SKAP2                              | 1.41×10 <sup>-7</sup>   |
|             |   |            | Lappalainen2013 | Lymphoblastoid EUR exonlevel, ENSG00000005020.8 | 1.01×10 <sup>-6</sup>   |
|             |   |            | Westra2013      | Whole Blood, SKAP2                              | 3.60×10 <sup>-126</sup> |
| rs727450    | 7 | 26,787,642 | GTEEx2015_v6    | Thyroid, HOXA5                                  | 9.08×10 <sup>-6</sup>   |
|             |   |            | GTEEx2015_v6    | Whole Blood, SKAP2                              | 3.25×10 <sup>-7</sup>   |
|             |   |            | Lappalainen2013 | Lymphoblastoid EUR exonlevel, ENSG00000005020.8 | 1.50×10 <sup>-6</sup>   |
|             |   |            | Westra2013      | Whole Blood, SKAP2                              | 5.16×10 <sup>-126</sup> |
| rs10281261  | 7 | 26,789,472 | GTEEx2015_v6    | Thyroid, HOXA5                                  | 1.11×10 <sup>-5</sup>   |
|             |   |            | GTEEx2015_v6    | Whole Blood, SKAP2                              | 1.37×10 <sup>-7</sup>   |
|             |   |            | Lappalainen2013 | Lymphoblastoid EUR exonlevel, ENSG00000005020.8 | 1.45×10 <sup>-6</sup>   |
|             |   |            | Westra2013      | Whole Blood, SKAP2                              | 5.16×10 <sup>-126</sup> |
| rs7457076   | 7 | 26,793,215 | GTEEx2015_v6    | Thyroid, HOXA5                                  | 9.39×10 <sup>-6</sup>   |
|             |   |            | GTEEx2015_v6    | Whole Blood, SKAP2                              | 1.27×10 <sup>-7</sup>   |
|             |   |            | Lappalainen2013 | Lymphoblastoid EUR exonlevel, ENSG00000005020.8 | 1.32×10 <sup>-6</sup>   |
|             |   |            | Westra2013      | Whole Blood, SKAP2                              | 6.55×10 <sup>-126</sup> |
| rs2189017   | 7 | 26,795,073 | GTEEx2015_v6    | Thyroid, HOXA5                                  | 8.16×10 <sup>-6</sup>   |
|             |   |            | GTEEx2015_v6    | Whole Blood, SKAP2                              | 1.23×10 <sup>-7</sup>   |
|             |   |            | Lappalainen2013 | Lymphoblastoid EUR exonlevel, ENSG00000005020.8 | 1.37×10 <sup>-6</sup>   |
|             |   |            | Westra2013      | Whole Blood, SKAP2                              | 6.07×10 <sup>-126</sup> |
| rs2189019   | 7 | 26,798,581 | GTEEx2015_v6    | Thyroid, HOXA5                                  | 7.90×10 <sup>-6</sup>   |
|             |   |            | GTEEx2015_v6    | Whole Blood, SKAP2                              | 1.23×10 <sup>-7</sup>   |
|             |   |            | Lappalainen2013 | Lymphoblastoid EUR exonlevel, ENSG00000005020.8 | 1.60×10 <sup>-6</sup>   |
|             |   |            | Westra2013      | Whole Blood, SKAP2                              | 6.07×10 <sup>-126</sup> |
| rs73061894  | 7 | 26,802,085 | GTEEx2015_v6    | Thyroid, HOXA5                                  | 7.48×10 <sup>-6</sup>   |
|             |   |            | GTEEx2015_v6    | Whole Blood, SKAP2                              | 1.21×10 <sup>-7</sup>   |
|             |   |            | Lappalainen2013 | Lymphoblastoid EUR exonlevel, ENSG00000005020.8 | 1.04×10 <sup>-6</sup>   |
| rs117217399 | 7 | 26,805,212 | Lappalainen2013 | Lymphoblastoid EUR exonlevel, ENSG00000005020.8 | 1.34×10 <sup>-6</sup>   |
| rs10486478  | 7 | 26,819,465 | GTEEx2015_v6    | Thyroid, HOXA5                                  | 1.62×10 <sup>-6</sup>   |
|             |   |            | GTEEx2015_v6    | Whole Blood, SKAP2                              | 3.69×10 <sup>-7</sup>   |
|             |   |            | Lappalainen2013 | Lymphoblastoid EUR exonlevel, ENSG00000005020.8 | 1.61×10 <sup>-7</sup>   |
|             |   |            | Westra2013      | Whole Blood, SKAP2                              | 3.98×10 <sup>-149</sup> |
| rs3801850   | 7 | 26,820,577 | GTEEx2015_v6    | Thyroid, HOXA5                                  | 3.64×10 <sup>-7</sup>   |
|             |   |            | GTEEx2015_v6    | Whole Blood, SKAP2                              | 6.89×10 <sup>-6</sup>   |
|             |   |            | Lappalainen2013 | Lymphoblastoid EUR exonlevel, ENSG00000005020.8 | 2.93×10 <sup>-8</sup>   |
|             |   |            | Westra2013      | Whole Blood, SKAP2                              | 2.36×10 <sup>-149</sup> |
| rs12536560  | 7 | 26,822,876 | GTEEx2015_v6    | Thyroid, HOXA5                                  | 3.64×10 <sup>-7</sup>   |
|             |   |            | GTEEx2015_v6    | Whole Blood, SKAP2                              | 7.14×10 <sup>-6</sup>   |
|             |   |            | Lappalainen2013 | Lymphoblastoid EUR exonlevel, ENSG00000005020.8 | 3.78×10 <sup>-8</sup>   |
|             |   |            | Westra2013      | Whole Blood, SKAP2                              | 1.91×10 <sup>-149</sup> |
| rs73065504  | 7 | 26,825,984 | GTEEx2015_v6    | Thyroid, HOXA5                                  | 9.16×10 <sup>-7</sup>   |
|             |   |            | GTEEx2015_v6    | Whole Blood, SKAP2                              | 1.19×10 <sup>-7</sup>   |
|             |   |            | Lappalainen2013 | Lymphoblastoid EUR exonlevel, ENSG00000005020.8 | 3.73×10 <sup>-8</sup>   |
| rs10267950  | 7 | 26,826,757 | GTEEx2015_v6    | Thyroid, HOXA5                                  | 3.64×10 <sup>-7</sup>   |
|             |   |            | GTEEx2015_v6    | Whole Blood, SKAP2                              | 1.04×10 <sup>-5</sup>   |
|             |   |            | Lappalainen2013 | Lymphoblastoid EUR exonlevel, ENSG00000005020.8 | 3.48×10 <sup>-8</sup>   |
|             |   |            | Westra2013      | Whole Blood, SKAP2                              | 1.51×10 <sup>-149</sup> |
| rs10272303  | 7 | 26,827,815 | GTEEx2015_v6    | Thyroid, HOXA5                                  | 3.64×10 <sup>-7</sup>   |
|             |   |            | GTEEx2015_v6    | Whole Blood, SKAP2                              | 1.04×10 <sup>-5</sup>   |
|             |   |            | Lappalainen2013 | Lymphoblastoid EUR exonlevel, ENSG00000005020.8 | 3.10×10 <sup>-8</sup>   |
| rs3801846   | 7 | 26,828,653 | GTEEx2015_v6    | Thyroid, HOXA5                                  | 3.92×10 <sup>-7</sup>   |
|             |   |            | Lappalainen2013 | Lymphoblastoid EUR exonlevel, ENSG00000005020.8 | 3.44×10 <sup>-8</sup>   |
|             |   |            | Westra2013      | Whole Blood, SKAP2                              | 1.11×10 <sup>-149</sup> |



|            |   |            |                 |                                                 |                         |
|------------|---|------------|-----------------|-------------------------------------------------|-------------------------|
| rs1327988  | 7 | 26,828,965 | GTEX2015_v6     | Thyroid, HOXA5                                  | 3.64×10 <sup>-7</sup>   |
|            |   |            | Lappalainen2013 | Lymphoblastoid EUR exonlevel, ENSG00000005020.8 | 3.18×10 <sup>-8</sup>   |
|            |   |            | Westra2013      | Whole Blood, SKAP2                              | 8.95×10 <sup>-150</sup> |
| rs3801844  | 7 | 26,829,759 | GTEX2015_v6     | Thyroid, HOXA5                                  | 3.64×10 <sup>-7</sup>   |
|            |   |            | Lappalainen2013 | Lymphoblastoid EUR exonlevel, ENSG00000005020.8 | 3.16×10 <sup>-8</sup>   |
|            |   |            | Westra2013      | Whole Blood, SKAP2                              | 8.95×10 <sup>-150</sup> |
| rs3801843  | 7 | 26,830,201 | GTEX2015_v6     | Thyroid, HOXA5                                  | 3.64×10 <sup>-7</sup>   |
|            |   |            | Lappalainen2013 | Lymphoblastoid EUR exonlevel, ENSG00000005020.8 | 3.34×10 <sup>-8</sup>   |
|            |   |            | Westra2013      | Whole Blood, SKAP2                              | 8.95×10 <sup>-150</sup> |
| rs3801842  | 7 | 26,830,263 | GTEX2015_v6     | Thyroid, HOXA5                                  | 3.64×10 <sup>-7</sup>   |
|            |   |            | Lappalainen2013 | Lymphoblastoid EUR exonlevel, ENSG00000005020.8 | 3.07×10 <sup>-8</sup>   |
|            |   |            | Westra2013      | Whole Blood, SKAP2                              | 8.95×10 <sup>-150</sup> |
| rs73065517 | 7 | 26,830,555 | GTEX2015_v6     | Thyroid, HOXA5                                  | 3.64×10 <sup>-7</sup>   |
|            |   |            | Lappalainen2013 | Lymphoblastoid EUR exonlevel, ENSG00000005020.8 | 4.16×10 <sup>-8</sup>   |
| rs28733208 | 7 | 26,830,825 | GTEX2015_v6     | Thyroid, HOXA5                                  | 3.64×10 <sup>-7</sup>   |
|            |   |            | Lappalainen2013 | Lymphoblastoid EUR exonlevel, ENSG00000005020.8 | 3.98×10 <sup>-8</sup>   |
| rs73065521 | 7 | 26,831,409 | GTEX2015_v6     | Thyroid, HOXA5                                  | 3.64×10 <sup>-7</sup>   |
|            |   |            | Lappalainen2013 | Lymphoblastoid EUR exonlevel, ENSG00000005020.8 | 3.14×10 <sup>-8</sup>   |
| rs3801840  | 7 | 26,832,986 | GTEX2015_v6     | Thyroid, HOXA5                                  | 3.64×10 <sup>-7</sup>   |
|            |   |            | GTEX2015_v6     | Whole Blood, SKAP2                              | 1.04×10 <sup>-5</sup>   |
|            |   |            | Lappalainen2013 | Lymphoblastoid EUR exonlevel, ENSG00000005020.8 | 3.76×10 <sup>-8</sup>   |
|            |   |            | Westra2013      | Whole Blood, SKAP2                              | 1.41×10 <sup>-150</sup> |
| rs1327989  | 7 | 26,833,563 | GTEX2015_v6     | Thyroid, HOXA5                                  | 3.52×10 <sup>-7</sup>   |
|            |   |            | Lappalainen2013 | Lymphoblastoid EUR exonlevel, ENSG00000005020.8 | 3.33×10 <sup>-8</sup>   |
|            |   |            | Westra2013      | Whole Blood, SKAP2                              | 1.14×10 <sup>-150</sup> |
| rs6964094  | 7 | 26,834,380 | GTEX2015_v6     | Thyroid, HOXA5                                  | 4.10×10 <sup>-7</sup>   |
|            |   |            | GTEX2015_v6     | Whole Blood, SKAP2                              | 1.17×10 <sup>-6</sup>   |
|            |   |            | Lappalainen2013 | Lymphoblastoid EUR exonlevel, ENSG00000005020.8 | 3.18×10 <sup>-8</sup>   |
|            |   |            | Westra2013      | Whole Blood, SKAP2                              | 5.02×10 <sup>-147</sup> |
| rs6956088  | 7 | 26,835,727 | GTEX2015_v6     | Thyroid, HOXA5                                  | 3.07×10 <sup>-7</sup>   |
|            |   |            | Lappalainen2013 | Lymphoblastoid EUR exonlevel, ENSG00000005020.8 | 4.27×10 <sup>-8</sup>   |
| rs10276471 | 7 | 26,837,940 | GTEX2015_v6     | Thyroid, HOXA5                                  | 2.56×10 <sup>-7</sup>   |
|            |   |            | Lappalainen2013 | Lymphoblastoid EUR exonlevel, ENSG00000005020.8 | 1.58×10 <sup>-8</sup>   |
| rs4722641  | 7 | 26,838,677 | GTEX2015_v6     | Thyroid, HOXA5                                  | 1.32×10 <sup>-6</sup>   |
|            |   |            | GTEX2015_v6     | Whole Blood, SKAP2                              | 7.60×10 <sup>-6</sup>   |
|            |   |            | Lappalainen2013 | Lymphoblastoid EUR exonlevel, ENSG00000005020.8 | 1.35×10 <sup>-8</sup>   |
| rs10225924 | 7 | 26,839,954 | GTEX2015_v6     | Thyroid, HOXA5                                  | 2.19×10 <sup>-7</sup>   |
|            |   |            | GTEX2015_v6     | Whole Blood, SKAP2                              | 1.03×10 <sup>-5</sup>   |
|            |   |            | Lappalainen2013 | Lymphoblastoid EUR exonlevel, ENSG00000005020.8 | 1.50×10 <sup>-8</sup>   |
| rs10229837 | 7 | 26,840,652 | GTEX2015_v6     | Thyroid, HOXA5                                  | 5.88×10 <sup>-7</sup>   |
|            |   |            | GTEX2015_v6     | Whole Blood, SKAP2                              | 9.85×10 <sup>-6</sup>   |
|            |   |            | Lappalainen2013 | Lymphoblastoid EUR exonlevel, ENSG00000005020.8 | 1.39×10 <sup>-8</sup>   |
| rs12532395 | 7 | 26,841,702 | GTEX2015_v6     | Thyroid, HOXA5                                  | 1.92×10 <sup>-7</sup>   |
|            |   |            | GTEX2015_v6     | Whole Blood, SKAP2                              | 1.03×10 <sup>-5</sup>   |
|            |   |            | Lappalainen2013 | Lymphoblastoid EUR exonlevel, ENSG00000005020.8 | 1.32×10 <sup>-8</sup>   |
| rs12539719 | 7 | 26,844,852 | GTEX2015_v6     | Thyroid, HOXA5                                  | 3.77×10 <sup>-7</sup>   |
|            |   |            | GTEX2015_v6     | Whole Blood, SKAP2                              | 9.70×10 <sup>-8</sup>   |
|            |   |            | Lappalainen2013 | Lymphoblastoid EUR exonlevel, ENSG00000005020.8 | 4.02×10 <sup>-8</sup>   |
| rs4722644  | 7 | 26,845,386 | GTEX2015_v6     | Thyroid, HOXA5, 4.66927614117146e-07            | 7.47×10 <sup>-6</sup>   |
|            |   |            | GTEX2015_v6     | Whole Blood, SKAP2                              | 7.47×10 <sup>-6</sup>   |
|            |   |            | Lappalainen2013 | Lymphoblastoid EUR exonlevel, ENSG00000005020.8 | 1.56×10 <sup>-8</sup>   |
| rs12333525 | 7 | 26,847,762 | GTEX2015_v6     | Thyroid, HOXA5                                  | 4.67×10 <sup>-7</sup>   |
|            |   |            | Lappalainen2013 | Lymphoblastoid EUR exonlevel, ENSG00000005020.8 | 1.07×10 <sup>-8</sup>   |
| rs10244986 | 7 | 26,849,558 | GTEX2015_v6     | Thyroid, HOXA5                                  | 4.67×10 <sup>-7</sup>   |
|            |   |            | GTEX2015_v6     | Whole Blood, SKAP2                              | 7.58×10 <sup>-6</sup>   |
|            |   |            | Lappalainen2013 | Lymphoblastoid EUR exonlevel, ENSG00000005020.8 | 1.49×10 <sup>-8</sup>   |

|             |   |            |                 |                                                 |                         |
|-------------|---|------------|-----------------|-------------------------------------------------|-------------------------|
| rs73067435  | 7 | 26,850,195 | GTEEx2015_v6    | Thyroid, HOXA5                                  | 4.67×10 <sup>-7</sup>   |
|             |   |            | GTEEx2015_v6    | Whole Blood, SKAP2                              | 7.45×10 <sup>-6</sup>   |
|             |   |            | Lappalainen2013 | Lymphoblastoid EUR exonlevel, ENSG00000005020.8 | 1.49×10 <sup>-8</sup>   |
| rs73067437  | 7 | 26,850,313 | GTEEx2015_v6    | Thyroid, HOXA5                                  | 3.26×10 <sup>-7</sup>   |
|             |   |            | GTEEx2015_v6    | Whole Blood, SKAP2                              | 1.18×10 <sup>-7</sup>   |
|             |   |            | Lappalainen2013 | Lymphoblastoid EUR exonlevel, ENSG00000005020.8 | 1.50×10 <sup>-8</sup>   |
| rs57135974  | 7 | 26,850,699 | GTEEx2015_v6    | Thyroid, HOXA5                                  | 4.67×10 <sup>-7</sup>   |
|             |   |            | GTEEx2015_v6    | Whole Blood, SKAP2                              | 7.35×10 <sup>-6</sup>   |
|             |   |            | Lappalainen2013 | Lymphoblastoid EUR exonlevel, ENSG00000005020.8 | 1.46×10 <sup>-8</sup>   |
| rs58760954  | 7 | 26,850,776 | GTEEx2015_v6    | Thyroid, HOXA5                                  | 4.67×10 <sup>-7</sup>   |
|             |   |            | GTEEx2015_v6    | Whole Blood, SKAP2                              | 7.33×10 <sup>-6</sup>   |
|             |   |            | Lappalainen2013 | Lymphoblastoid EUR exonlevel, ENSG00000005020.8 | 1.26×10 <sup>-8</sup>   |
| rs73067443  | 7 | 26,851,074 | GTEEx2015_v6    | Thyroid, HOXA5                                  | 4.67×10 <sup>-7</sup>   |
|             |   |            | GTEEx2015_v6    | Whole Blood, SKAP2                              | 7.27×10 <sup>-6</sup>   |
|             |   |            | Lappalainen2013 | Lymphoblastoid EUR exonlevel, ENSG00000005020.8 | 1.47×10 <sup>-8</sup>   |
| rs3801837   | 7 | 26,851,361 | GTEEx2015_v6    | Thyroid, HOXA5                                  | 4.67×10 <sup>-7</sup>   |
|             |   |            | GTEEx2015_v6    | Whole Blood, SKAP2                              | 7.23×10 <sup>-6</sup>   |
|             |   |            | Lappalainen2013 | Lymphoblastoid EUR exonlevel, ENSG00000005020.8 | 1.21×10 <sup>-8</sup>   |
| rs3801836   | 7 | 26,851,400 | GTEEx2015_v6    | Thyroid, HOXA5                                  | 5.37×10 <sup>-7</sup>   |
|             |   |            | GTEEx2015_v6    | Whole Blood, SKAP2                              | 3.01×10 <sup>-6</sup>   |
|             |   |            | Lappalainen2013 | Lymphoblastoid EUR exonlevel, ENSG00000005020.8 | 1.27×10 <sup>-8</sup>   |
| rs3801834   | 7 | 26,852,062 | GTEEx2015_v6    | Thyroid, HOXA5                                  | 4.77×10 <sup>-7</sup>   |
|             |   |            | Lappalainen2013 | Lymphoblastoid EUR exonlevel, ENSG00000005020.8 | 1.22×10 <sup>-8</sup>   |
| rs3801833   | 7 | 26,852,212 | GTEEx2015_v6    | Thyroid, HOXA5                                  | 4.67×10 <sup>-7</sup>   |
|             |   |            | GTEEx2015_v6    | Whole Blood, SKAP2                              | 7.17×10 <sup>-6</sup>   |
|             |   |            | Lappalainen2013 | Lymphoblastoid EUR exonlevel, ENSG00000005020.8 | 1.58×10 <sup>-8</sup>   |
| rs3801832   | 7 | 26,852,280 | GTEEx2015_v6    | Thyroid, HOXA5                                  | 4.67×10 <sup>-7</sup>   |
|             |   |            | GTEEx2015_v6    | Whole Blood, SKAP2                              | 7.14×10 <sup>-6</sup>   |
|             |   |            | Lappalainen2013 | Lymphoblastoid EUR exonlevel, ENSG00000005020.8 | 1.46×10 <sup>-8</sup>   |
| rs7802715   | 7 | 26,852,720 | GTEEx2015_v6    | Thyroid, HOXA5                                  | 5.52×10 <sup>-6</sup>   |
|             |   |            | GTEEx2015_v6    | Whole Blood, SKAP2                              | 5.16×10 <sup>-6</sup>   |
|             |   |            | Lappalainen2013 | Lymphoblastoid EUR exonlevel, ENSG00000005020.8 | 1.00×10 <sup>-8</sup>   |
| rs7785815   | 7 | 26,852,728 | GTEEx2015_v6    | Thyroid, HOXA5                                  | 5.52×10 <sup>-6</sup>   |
|             |   |            | Lappalainen2013 | Lymphoblastoid EUR exonlevel, ENSG00000005020.8 | 1.17×10 <sup>-8</sup>   |
| rs114978183 | 7 | 26,852,740 | .               | .                                               | .                       |
| rs115453073 | 7 | 26,852,741 | GTEEx2015_v6    | Thyroid, HOXA5                                  | 5.45×10 <sup>-6</sup>   |
|             |   |            | GTEEx2015_v6    | Whole Blood, SKAP2                              | 6.61×10 <sup>-6</sup>   |
|             |   |            | Lappalainen2013 | Lymphoblastoid EUR exonlevel, ENSG00000005020.8 | 1.85×10 <sup>-8</sup>   |
| rs7785832   | 7 | 26,852,760 | GTEEx2015_v6    | Thyroid, HOXA5                                  | 4.69×10 <sup>-7</sup>   |
|             |   |            | GTEEx2015_v6    | Whole Blood, SKAP2                              | 6.48×10 <sup>-6</sup>   |
|             |   |            | Lappalainen2013 | Lymphoblastoid EUR exonlevel, ENSG00000005020.8 | 1.95×10 <sup>-8</sup>   |
|             |   |            | Westra2013      | Whole Blood, SKAP2                              | 1.08×10 <sup>-153</sup> |
| rs17315334  | 7 | 26,852,860 | GTEEx2015_v6    | Thyroid, HOXA5                                  | 4.69×10 <sup>-7</sup>   |
|             |   |            | GTEEx2015_v6    | Whole Blood, SKAP2                              | 6.47×10 <sup>-6</sup>   |
|             |   |            | Lappalainen2013 | Lymphoblastoid EUR exonlevel, ENSG00000005020.8 | 2.02×10 <sup>-8</sup>   |
| rs73067456  | 7 | 26,852,998 | GTEEx2015_v6    | Thyroid, HOXA5                                  | 4.67×10 <sup>-7</sup>   |
|             |   |            | GTEEx2015_v6    | Whole Blood, SKAP2                              | 7.00×10 <sup>-6</sup>   |
|             |   |            | Lappalainen2013 | Lymphoblastoid EUR exonlevel, ENSG00000005020.8 | 1.48×10 <sup>-8</sup>   |
| rs3801831   | 7 | 26,853,470 | GTEEx2015_v6    | Thyroid, HOXA5                                  | 4.67×10 <sup>-7</sup>   |
|             |   |            | GTEEx2015_v6    | Whole Blood, SKAP2                              | 6.98×10 <sup>-6</sup>   |
|             |   |            | Lappalainen2013 | Lymphoblastoid EUR exonlevel, ENSG00000005020.8 | 4.27×10 <sup>-8</sup>   |
|             |   |            | Westra2013      | Whole Blood, SKAP2                              | 1.48×10 <sup>-153</sup> |
| rs3823938   | 7 | 26,853,741 | GTEEx2015_v6    | Thyroid, HOXA5                                  | 4.67×10 <sup>-7</sup>   |
|             |   |            | GTEEx2015_v6    | Whole Blood, SKAP2                              | 6.97×10 <sup>-6</sup>   |
|             |   |            | Lappalainen2013 | Lymphoblastoid EUR exonlevel, ENSG00000005020.8 | 7.89×10 <sup>-8</sup>   |

|            |   |            |                 |                                                 |             |
|------------|---|------------|-----------------|-------------------------------------------------|-------------|
| rs3823936  | 7 | 26,853,830 | GTEX2015_v6     | Thyroid, HOXA5                                  | 4.67×10-7   |
|            |   |            | GTEX2015_v6     | Whole Blood, SKAP2                              | 6.97×10-6   |
|            |   |            | Lappalainen2013 | Lymphoblastoid EUR exonlevel, ENSG00000005020.8 | 6.67×10-8   |
|            |   |            | Westra2013      | Whole Blood, SKAP2                              | 1.48×10-153 |
| rs3823934  | 7 | 26,853,934 | GTEX2015_v6     | Thyroid, HOXA5                                  | 3.07×10-7   |
|            |   |            | GTEX2015_v6     | Whole Blood, SKAP2                              | 1.18×10-7   |
|            |   |            | Lappalainen2013 | Lymphoblastoid EUR exonlevel, ENSG00000005020.8 | 7.81×10-8   |
|            |   |            | Westra2013      | Whole Blood, SKAP2                              | 1.19×10-153 |
| rs3823933  | 7 | 26,853,966 | GTEX2015_v6     | Thyroid, HOXA5                                  | 4.67×10-7   |
|            |   |            | GTEX2015_v6     | Whole Blood, SKAP2                              | 6.97×10-6   |
|            |   |            | Lappalainen2013 | Lymphoblastoid EUR exonlevel, ENSG00000005020.8 | 5.93×10-8   |
|            |   |            | Westra2013      | Whole Blood, SKAP2                              | 1.19×10-153 |
| rs3823932  | 7 | 26,853,980 | GTEX2015_v6     | Thyroid, HOXA5                                  | 4.67×10-7   |
|            |   |            | GTEX2015_v6     | Whole Blood, SKAP2                              | 6.97×10-6   |
|            |   |            | Lappalainen2013 | Lymphoblastoid EUR exonlevel, ENSG00000005020.8 | 7.33×10-8   |
|            |   |            | Westra2013      | Whole Blood, SKAP2                              | 1.19×10-153 |
| rs3823931  | 7 | 26,854,026 | GTEX2015_v6     | Thyroid, HOXA5                                  | 4.67×10-7   |
|            |   |            | GTEX2015_v6     | Whole Blood, SKAP2                              | 6.97×10-6   |
|            |   |            | Lappalainen2013 | Lymphoblastoid EUR exonlevel, ENSG00000005020.8 | 6.35×10-8   |
| rs10262414 | 7 | 26,854,266 | GTEX2015_v6     | Thyroid, HOXA5                                  | 4.67×10-7   |
|            |   |            | GTEX2015_v6     | Whole Blood, SKAP2                              | 2.65×10-6   |
|            |   |            | Lappalainen2013 | Lymphoblastoid EUR exonlevel, ENSG00000005020.8 | 6.76×10-8   |
|            |   |            | Westra2013      | Whole Blood, SKAP2                              | 8.07×10-154 |
| rs12532199 | 7 | 26,854,375 | GTEX2015_v6     | Thyroid, HOXA5                                  | 4.67×10-7   |
|            |   |            | GTEX2015_v6     | Whole Blood, SKAP2                              | 6.97×10-6   |
|            |   |            | Lappalainen2013 | Lymphoblastoid EUR exonlevel, ENSG00000005020.8 | 5.98×10-8   |
| rs12537323 | 7 | 26,854,388 | GTEX2015_v6     | Thyroid, HOXA5                                  | 4.68×10-7   |
|            |   |            | GTEX2015_v6     | Whole Blood, SKAP2                              | 6.96×10-6   |
|            |   |            | Lappalainen2013 | Lymphoblastoid EUR exonlevel, ENSG00000005020.8 | 5.99×10-8   |
|            |   |            | Westra2013      | Whole Blood, SKAP2                              | 1.08×10-153 |
| rs28617235 | 7 | 26,854,671 | GTEX2015_v6     | Thyroid, HOXA5                                  | 4.67×10-7   |
|            |   |            | GTEX2015_v6     | Whole Blood, SKAP2                              | 6.97×10-6   |
|            |   |            | Lappalainen2013 | Lymphoblastoid EUR exonlevel, ENSG00000005020.8 | 6.40×10-8   |
| rs12532796 | 7 | 26,854,828 | GTEX2015_v6     | Thyroid, HOXA5                                  | 3.07×10-7   |
|            |   |            | GTEX2015_v6     | Whole Blood, SKAP2                              | 1.18×10-7   |
|            |   |            | Lappalainen2013 | Lymphoblastoid EUR exonlevel, ENSG00000005020.8 | 6.76×10-8   |
|            |   |            | Westra2013      | Whole Blood, SKAP2                              | 1.08×10-153 |
| rs3801830  | 7 | 26,854,870 | GTEX2015_v6     | Thyroid, HOXA5                                  | 4.74×10-7   |
|            |   |            | GTEX2015_v6     | Whole Blood, SKAP2                              | 6.98×10-6   |
|            |   |            | Lappalainen2013 | Lymphoblastoid EUR exonlevel, ENSG00000005020.8 | 6.15×10-8   |
|            |   |            | Westra2013      | Whole Blood, SKAP2                              | 4.83×10-150 |
| rs3801829  | 7 | 26,854,996 | GTEX2015_v6     | Thyroid, HOXA5                                  | 4.67×10-7   |
|            |   |            | GTEX2015_v6     | Whole Blood, SKAP2                              | 6.97×10-6   |
|            |   |            | Lappalainen2013 | Lymphoblastoid EUR exonlevel, ENSG00000005020.8 | 6.01×10-8   |
| rs10266759 | 7 | 26,855,282 | GTEX2015_v6     | Thyroid, HOXA5                                  | 4.67×10-7   |
|            |   |            | GTEX2015_v6     | Whole Blood, SKAP2                              | 6.97×10-6   |
|            |   |            | Lappalainen2013 | Lymphoblastoid EUR exonlevel, ENSG00000005020.8 | 4.99×10-8   |
| rs3801828  | 7 | 26,855,284 | GTEX2015_v6     | Thyroid, HOXA5                                  | 4.67×10-7   |
|            |   |            | GTEX2015_v6     | Whole Blood, SKAP2                              | 6.97×10-6   |
|            |   |            | Lappalainen2013 | Lymphoblastoid EUR exonlevel, ENSG00000005020.8 | 6.41×10-8   |
|            |   |            | Westra2013      | Whole Blood, SKAP2                              | 1.08×10-153 |
| rs6948584  | 7 | 26,855,732 | GTEX2015_v6     | Thyroid, HOXA5                                  | 4.36×10-7   |
|            |   |            | GTEX2015_v6     | Whole Blood, SKAP2                              | 7.38×10-6   |
|            |   |            | Lappalainen2013 | Lymphoblastoid EUR exonlevel, ENSG00000005020.8 | 1.55×10-8   |

|             |   |            |                 |                                                 |                         |
|-------------|---|------------|-----------------|-------------------------------------------------|-------------------------|
| rs6948657   | 7 | 26,855,943 | GTEEx2015_v6    | Thyroid, HOXA5                                  | 4.43×10 <sup>-7</sup>   |
|             |   |            | GTEEx2015_v6    | Whole Blood, SKAP2                              | 6.72×10 <sup>-6</sup>   |
|             |   |            | Lappalainen2013 | Lymphoblastoid EUR exonlevel, ENSG00000005020.8 | 1.52×10 <sup>-8</sup>   |
|             |   |            | Westra2013      | Whole Blood, SKAP2                              | 1.08×10 <sup>-153</sup> |
| rs73067472  | 7 | 26,855,959 | GTEEx2015_v6    | Thyroid, HOXA5                                  | 2.76×10 <sup>-7</sup>   |
|             |   |            | GTEEx2015_v6    | Whole Blood, SKAP2                              | 1.14×10 <sup>-7</sup>   |
|             |   |            | Lappalainen2013 | Lymphoblastoid EUR exonlevel, ENSG00000005020.8 | 1.46×10 <sup>-8</sup>   |
| rs3823930   | 7 | 26,856,525 | GTEEx2015_v6    | Thyroid, HOXA5                                  | 4.43×10 <sup>-7</sup>   |
|             |   |            | GTEEx2015_v6    | Whole Blood, SKAP2                              | 6.72×10 <sup>-6</sup>   |
|             |   |            | Lappalainen2013 | Lymphoblastoid EUR exonlevel, ENSG00000005020.8 | 1.29×10 <sup>-8</sup>   |
| rs3823929   | 7 | 26,856,600 | GTEEx2015_v6    | Thyroid, HOXA5                                  | 3.85×10 <sup>-7</sup>   |
|             |   |            | GTEEx2015_v6    | Whole Blood, SKAP2                              | 3.84×10 <sup>-6</sup>   |
|             |   |            | Lappalainen2013 | Lymphoblastoid EUR exonlevel, ENSG00000005020.8 | 1.51×10 <sup>-8</sup>   |
| rs3801827   | 7 | 26,856,626 | GTEEx2015_v6    | Thyroid, HOXA5                                  | 4.43×10 <sup>-7</sup>   |
|             |   |            | GTEEx2015_v6    | Whole Blood, SKAP2                              | 6.72×10 <sup>-6</sup>   |
|             |   |            | Lappalainen2013 | Lymphoblastoid EUR exonlevel, ENSG00000005020.8 | 1.61×10 <sup>-8</sup>   |
| rs3801826   | 7 | 26,856,720 | GTEEx2015_v6    | Thyroid, HOXA5                                  | 4.43×10 <sup>-7</sup>   |
|             |   |            | GTEEx2015_v6    | Whole Blood, SKAP2                              | 6.72×10 <sup>-6</sup>   |
|             |   |            | Lappalainen2013 | Lymphoblastoid EUR exonlevel, ENSG00000005020.8 | 1.49×10 <sup>-8</sup>   |
| rs3801825   | 7 | 26,856,959 | GTEEx2015_v6    | Thyroid, HOXA5                                  | 4.43×10 <sup>-7</sup>   |
|             |   |            | GTEEx2015_v6    | Whole Blood, SKAP2                              | 6.72×10 <sup>-6</sup>   |
|             |   |            | Lappalainen2013 | Lymphoblastoid EUR exonlevel, ENSG00000005020.8 | 1.35×10 <sup>-8</sup>   |
|             |   |            | Westra2013      | Whole Blood, SKAP2                              | 8.56×10 <sup>-154</sup> |
| rs73067475  | 7 | 26,857,120 | GTEEx2015_v6    | Thyroid, HOXA5                                  | 4.43×10 <sup>-7</sup>   |
|             |   |            | GTEEx2015_v6    | Whole Blood, SKAP2                              | 6.72×10 <sup>-6</sup>   |
|             |   |            | Lappalainen2013 | Lymphoblastoid EUR exonlevel, ENSG00000005020.8 | 1.41×10 <sup>-8</sup>   |
| rs73067476  | 7 | 26,857,240 | GTEEx2015_v6    | Thyroid, HOXA5                                  | 4.43×10 <sup>-7</sup>   |
|             |   |            | GTEEx2015_v6    | Whole Blood, SKAP2                              | 6.72×10 <sup>-6</sup>   |
|             |   |            | Lappalainen2013 | Lymphoblastoid EUR exonlevel, ENSG00000005020.8 | 1.43×10 <sup>-8</sup>   |
| rs115447617 | 7 | 26,857,751 | Lappalainen2013 | Lymphoblastoid EUR exonlevel, ENSG00000005020.8 | 1.54×10 <sup>-8</sup>   |
| rs111373218 | 7 | 26,859,152 | GTEEx2015_v6    | Thyroid, HOXA5                                  | 1.03×10 <sup>-5</sup>   |
|             |   |            | Lappalainen2013 | Lymphoblastoid EUR exonlevel, ENSG00000005020.8 | 2.46×10 <sup>-9</sup>   |
| rs17315775  | 7 | 26,860,134 | GTEEx2015_v6    | Thyroid, HOXA5                                  | 4.43×10 <sup>-7</sup>   |
|             |   |            | GTEEx2015_v6    | Whole Blood, SKAP2                              | 6.71×10 <sup>-6</sup>   |
|             |   |            | Lappalainen2013 | Lymphoblastoid EUR exonlevel, ENSG00000005020.8 | 1.37×10 <sup>-8</sup>   |
|             |   |            | Westra2013      | Whole Blood, SKAP2                              | 8.56×10 <sup>-154</sup> |
| rs28404962  | 7 | 26,860,324 | GTEEx2015_v6    | Thyroid, HOXA5                                  | 4.43×10 <sup>-7</sup>   |
|             |   |            | GTEEx2015_v6    | Whole Blood, SKAP2                              | 6.71×10 <sup>-6</sup>   |
|             |   |            | Lappalainen2013 | Lymphoblastoid EUR exonlevel, ENSG00000005020.8 | 1.51×10 <sup>-8</sup>   |
| rs13438513  | 7 | 26,860,633 | GTEEx2015_v6    | Thyroid, HOXA5                                  | 4.43×10 <sup>-7</sup>   |
|             |   |            | GTEEx2015_v6    | Whole Blood, SKAP2                              | 6.71×10 <sup>-6</sup>   |
|             |   |            | Lappalainen2013 | Lymphoblastoid EUR exonlevel, ENSG00000005020.8 | 1.84×10 <sup>-8</sup>   |
|             |   |            | Westra2013      | Whole Blood, SKAP2                              | 8.56×10 <sup>-154</sup> |
| rs13438514  | 7 | 26,860,688 | GTEEx2015_v6    | Thyroid, HOXA5                                  | 4.45×10 <sup>-7</sup>   |
|             |   |            | GTEEx2015_v6    | Whole Blood, SKAP2                              | 6.53×10 <sup>-6</sup>   |
|             |   |            | Lappalainen2013 | Lymphoblastoid EUR exonlevel, ENSG00000005020.8 | 1.67×10 <sup>-8</sup>   |
|             |   |            | Westra2013      | Whole Blood, SKAP2                              | 8.56×10 <sup>-154</sup> |
| rs55739485  | 7 | 26,860,741 | GTEEx2015_v6    | Thyroid, HOXA5                                  | 4.42×10 <sup>-7</sup>   |
|             |   |            | GTEEx2015_v6    | Whole Blood, SKAP2                              | 6.72×10 <sup>-6</sup>   |
|             |   |            | Lappalainen2013 | Lymphoblastoid EUR exonlevel, ENSG00000005020.8 | 1.53×10 <sup>-8</sup>   |
| rs3801823   | 7 | 26,861,031 | GTEEx2015_v6    | Thyroid, HOXA5                                  | 4.32×10 <sup>-7</sup>   |
|             |   |            | GTEEx2015_v6    | Whole Blood, SKAP2                              | 8.96×10 <sup>-6</sup>   |
|             |   |            | Lappalainen2013 | Lymphoblastoid EUR exonlevel, ENSG00000005020.8 | 1.66×10 <sup>-8</sup>   |
| rs3801822   | 7 | 26,861,201 | GTEEx2015_v6    | Thyroid, HOXA5                                  | 4.42×10 <sup>-7</sup>   |
|             |   |            | GTEEx2015_v6    | Whole Blood, SKAP2                              | 6.72×10 <sup>-6</sup>   |
|             |   |            | Lappalainen2013 | Lymphoblastoid EUR exonlevel, ENSG00000005020.8 | 2.09×10 <sup>-8</sup>   |

|            |   |            |                 |                                                 |                         |
|------------|---|------------|-----------------|-------------------------------------------------|-------------------------|
| rs3801821  | 7 | 26,861,206 | GTEEx2015_v6    | Thyroid, HOXA5                                  | 4.42×10 <sup>-7</sup>   |
|            |   |            | GTEEx2015_v6    | Whole Blood, SKAP2                              | 6.72×10 <sup>-6</sup>   |
|            |   |            | Lappalainen2013 | Lymphoblastoid EUR exonlevel, ENSG00000005020.8 | 1.98×10 <sup>-8</sup>   |
|            |   |            | Westra2013      | Whole Blood, SKAP2                              | 8.56×10 <sup>-154</sup> |
| rs3801820  | 7 | 26,861,353 | GTEEx2015_v6    | Thyroid, HOXA5                                  | 4.42×10 <sup>-7</sup>   |
|            |   |            | GTEEx2015_v6    | Whole Blood, SKAP2                              | 6.72×10 <sup>-6</sup>   |
|            |   |            | Lappalainen2013 | Lymphoblastoid EUR exonlevel, ENSG00000005020.8 | 1.51×10 <sup>-8</sup>   |
|            |   |            | Westra2013      | Whole Blood, SKAP2                              | 8.56×10 <sup>-154</sup> |
| rs7785689  | 7 | 26,861,609 | GTEEx2015_v6    | Thyroid, HOXA5                                  | 4.42×10 <sup>-7</sup>   |
|            |   |            | GTEEx2015_v6    | Whole Blood, SKAP2                              | 6.72×10 <sup>-6</sup>   |
|            |   |            | Lappalainen2013 | Lymphoblastoid EUR exonlevel, ENSG00000005020.8 | 1.41×10 <sup>-8</sup>   |
| rs7785711  | 7 | 26,861,640 | GTEEx2015_v6    | Thyroid, HOXA5                                  | 4.29×10 <sup>-7</sup>   |
|            |   |            | GTEEx2015_v6    | Whole Blood, SKAP2                              | 7.32×10 <sup>-6</sup>   |
|            |   |            | Lappalainen2013 | Lymphoblastoid EUR exonlevel, ENSG00000005020.8 | 1.33×10 <sup>-8</sup>   |
| rs7785798  | 7 | 26,861,943 | GTEEx2015_v6    | Thyroid, HOXA5                                  | 4.42×10 <sup>-7</sup>   |
|            |   |            | GTEEx2015_v6    | Whole Blood, SKAP2                              | 6.72×10 <sup>-6</sup>   |
|            |   |            | Lappalainen2013 | Lymphoblastoid EUR exonlevel, ENSG00000005020.8 | 1.71×10 <sup>-8</sup>   |
| rs7785918  | 7 | 26,861,959 | GTEEx2015_v6    | Thyroid, HOXA5                                  | 4.35×10 <sup>-7</sup>   |
|            |   |            | GTEEx2015_v6    | Whole Blood, SKAP2                              | 6.93×10 <sup>-6</sup>   |
|            |   |            | Lappalainen2013 | Lymphoblastoid EUR exonlevel, ENSG00000005020.8 | 1.59×10 <sup>-8</sup>   |
| rs12540045 | 7 | 26,863,174 | GTEEx2015_v6    | Thyroid, HOXA5                                  | 4.43×10 <sup>-7</sup>   |
|            |   |            | GTEEx2015_v6    | Whole Blood, SKAP2                              | 6.71×10 <sup>-6</sup>   |
|            |   |            | Lappalainen2013 | Lymphoblastoid EUR exonlevel, ENSG00000005020.8 | 1.43×10 <sup>-8</sup>   |
| rs10248500 | 7 | 26,863,294 | GTEEx2015_v6    | Thyroid, HOXA5                                  | 4.43×10 <sup>-7</sup>   |
|            |   |            | GTEEx2015_v6    | Whole Blood, SKAP2                              | 6.71×10 <sup>-6</sup>   |
|            |   |            | Lappalainen2013 | Lymphoblastoid EUR exonlevel, ENSG00000005020.8 | 1.53×10 <sup>-8</sup>   |
| rs17315929 | 7 | 26,864,173 | GTEEx2015_v6    | Thyroid, HOXA5                                  | 4.43×10 <sup>-7</sup>   |
|            |   |            | GTEEx2015_v6    | Whole Blood, SKAP2                              | 6.65×10 <sup>-6</sup>   |
|            |   |            | Lappalainen2013 | Lymphoblastoid EUR exonlevel, ENSG00000005020.8 | 5.25×10 <sup>-8</sup>   |
|            |   |            | Westra2013      | Whole Blood, SKAP2                              | 5.78×10 <sup>-154</sup> |
| rs10227673 | 7 | 26,865,299 | GTEEx2015_v6    | Thyroid, HOXA5                                  | 4.43×10 <sup>-7</sup>   |
|            |   |            | GTEEx2015_v6    | Whole Blood, SKAP2                              | 6.71×10 <sup>-6</sup>   |
|            |   |            | Lappalainen2013 | Lymphoblastoid EUR exonlevel, ENSG00000005020.8 | 1.15×10 <sup>-8</sup>   |
| rs7805766  | 7 | 26,865,610 | GTEEx2015_v6    | Thyroid, HOXA5                                  | 4.43×10 <sup>-7</sup>   |
|            |   |            | GTEEx2015_v6    | Whole Blood, SKAP2                              | 1.11×10 <sup>-5</sup>   |
|            |   |            | Lappalainen2013 | Lymphoblastoid EUR exonlevel, ENSG00000005020.8 | 1.16×10 <sup>-8</sup>   |
|            |   |            | Westra2013      | Whole Blood, SKAP2                              | 5.37×10 <sup>-159</sup> |
| rs17375272 | 7 | 26,866,497 | GTEEx2015_v6    | Thyroid, HOXA5                                  | 2.97×10 <sup>-7</sup>   |
|            |   |            | Lappalainen2013 | Lymphoblastoid EUR exonlevel, ENSG00000005020.8 | 1.30×10 <sup>-8</sup>   |
| rs3801819  | 7 | 26,866,698 | GTEEx2015_v6    | Thyroid, HOXA5                                  | 2.76×10 <sup>-7</sup>   |
|            |   |            | GTEEx2015_v6    | Whole Blood, SKAP2                              | 1.14×10 <sup>-7</sup>   |
|            |   |            | Lappalainen2013 | Lymphoblastoid EUR exonlevel, ENSG00000005020.8 | 1.39×10 <sup>-8</sup>   |
|            |   |            | Westra2013      | Whole Blood, SKAP2                              | 1.94×10 <sup>-154</sup> |
| rs61354389 | 7 | 26,868,343 | GTEEx2015_v6    | Thyroid, HOXA5                                  | 4.43×10 <sup>-7</sup>   |
|            |   |            | GTEEx2015_v6    | Whole Blood, SKAP2                              | 6.71×10 <sup>-6</sup>   |
|            |   |            | Lappalainen2013 | Lymphoblastoid EUR exonlevel, ENSG00000005020.8 | 1.10×10 <sup>-8</sup>   |
| rs10225700 | 7 | 26,869,880 | GTEEx2015_v6    | Thyroid, HOXA5                                  | 2.26×10 <sup>-6</sup>   |
|            |   |            | GTEEx2015_v6    | Whole Blood, SKAP2                              | 8.05×10 <sup>-6</sup>   |
|            |   |            | Lappalainen2013 | Lymphoblastoid EUR exonlevel, ENSG00000005020.8 | 3.62×10 <sup>-8</sup>   |
| rs10241234 | 7 | 26,869,887 | GTEEx2015_v6    | Thyroid, HOXA5                                  | 3.78×10 <sup>-6</sup>   |
|            |   |            | GTEEx2015_v6    | Whole Blood, SKAP2                              | 3.39×10 <sup>-6</sup>   |
|            |   |            | Lappalainen2013 | Lymphoblastoid EUR exonlevel, ENSG00000005020.8 | 4.69×10 <sup>-8</sup>   |
| rs10225904 | 7 | 26,869,888 | GTEEx2015_v6    | Thyroid, HOXA5                                  | 3.78×10 <sup>-6</sup>   |
|            |   |            | GTEEx2015_v6    | Whole Blood, SKAP2                              | 3.39×10 <sup>-6</sup>   |
|            |   |            | Lappalainen2013 | Lymphoblastoid EUR exonlevel, ENSG00000005020.8 | 4.34×10 <sup>-8</sup>   |

|                 |                                                 |                       |                 |                                                 |                         |              |                    |                       |
|-----------------|-------------------------------------------------|-----------------------|-----------------|-------------------------------------------------|-------------------------|--------------|--------------------|-----------------------|
| rs28550029      | 7                                               | 26,872,581            | GTEEx2015_v6    | Thyroid, HOXA5                                  | 4.43×10 <sup>-7</sup>   |              |                    |                       |
|                 |                                                 |                       | GTEEx2015_v6    | Whole Blood, SKAP2                              | 6.71×10 <sup>-6</sup>   |              |                    |                       |
|                 |                                                 |                       | Lappalainen2013 | Lymphoblastoid EUR exonlevel, ENSG00000005020.8 | 1.40×10 <sup>-8</sup>   |              |                    |                       |
| rs114236648     | 7                                               | 26,874,639            | Lappalainen2013 | Lymphoblastoid EUR exonlevel, ENSG00000005020.8 | 2.20×10 <sup>-8</sup>   |              |                    |                       |
|                 |                                                 |                       | rs12534899      | 7                                               | 26,877,189              | GTEEx2015_v6 | Thyroid, HOXA5     | 4.43×10 <sup>-7</sup> |
|                 |                                                 |                       |                 |                                                 |                         | GTEEx2015_v6 | Whole Blood, SKAP2 | 6.71×10 <sup>-6</sup> |
| Lappalainen2013 | Lymphoblastoid EUR exonlevel, ENSG00000005020.8 | 1.46×10 <sup>-8</sup> |                 |                                                 |                         |              |                    |                       |
| rs12534921      | 7                                               | 26,877,210            | Westra2013      | Whole Blood, SKAP2                              | 7.96×10 <sup>-155</sup> |              |                    |                       |
|                 |                                                 |                       | GTEEx2015_v6    | Thyroid, HOXA5                                  | 4.43×10 <sup>-7</sup>   |              |                    |                       |
|                 |                                                 |                       | GTEEx2015_v6    | Whole Blood, SKAP2                              | 6.71×10 <sup>-6</sup>   |              |                    |                       |
| rs73069507      | 7                                               | 26,877,536            | Lappalainen2013 | Lymphoblastoid EUR exonlevel, ENSG00000005020.8 | 2.10×10 <sup>-8</sup>   |              |                    |                       |
|                 |                                                 |                       | GTEEx2015_v6    | Thyroid, HOXA5                                  | 4.43×10 <sup>-7</sup>   |              |                    |                       |
|                 |                                                 |                       | GTEEx2015_v6    | Whole Blood, SKAP2                              | 6.71×10 <sup>-6</sup>   |              |                    |                       |
| rs73069510      | 7                                               | 26,877,567            | Lappalainen2013 | Lymphoblastoid EUR exonlevel, ENSG00000005020.8 | 2.30×10 <sup>-8</sup>   |              |                    |                       |
|                 |                                                 |                       | GTEEx2015_v6    | Thyroid, HOXA5                                  | 3.32×10 <sup>-7</sup>   |              |                    |                       |
|                 |                                                 |                       | GTEEx2015_v6    | Whole Blood, SKAP2                              | 6.71×10 <sup>-6</sup>   |              |                    |                       |
| rs3801816       | 7                                               | 26,881,177            | Lappalainen2013 | Lymphoblastoid EUR exonlevel, ENSG00000005020.8 | 1.86×10 <sup>-8</sup>   |              |                    |                       |
|                 |                                                 |                       | GTEEx2015_v6    | Thyroid, HOXA5                                  | 4.57×10 <sup>-7</sup>   |              |                    |                       |
|                 |                                                 |                       | GTEEx2015_v6    | Whole Blood, SKAP2                              | 6.99×10 <sup>-6</sup>   |              |                    |                       |
|                 |                                                 |                       | Westra2013      | Whole Blood, SKAP2                              | 5.64×10 <sup>-155</sup> |              |                    |                       |
| rs3801815       | 7                                               | 26,881,292            | Lappalainen2013 | Lymphoblastoid EUR exonlevel, ENSG00000005020.8 | 9.22×10 <sup>-9</sup>   |              |                    |                       |
|                 |                                                 |                       | GTEEx2015_v6    | Thyroid, HOXA5                                  | 4.76×10 <sup>-7</sup>   |              |                    |                       |
|                 |                                                 |                       | GTEEx2015_v6    | Whole Blood, SKAP2                              | 2.22×10 <sup>-6</sup>   |              |                    |                       |
|                 |                                                 |                       | Westra2013      | Whole Blood, SKAP2                              | 5.64×10 <sup>-155</sup> |              |                    |                       |
| rs3801814       | 7                                               | 26,881,302            | Lappalainen2013 | Lymphoblastoid EUR exonlevel, ENSG00000005020.8 | 1.90×10 <sup>-8</sup>   |              |                    |                       |
|                 |                                                 |                       | GTEEx2015_v6    | Thyroid, HOXA5                                  | 4.67×10 <sup>-7</sup>   |              |                    |                       |
|                 |                                                 |                       | GTEEx2015_v6    | Whole Blood, SKAP2                              | 2.65×10 <sup>-6</sup>   |              |                    |                       |
|                 |                                                 |                       | Westra2013      | Whole Blood, SKAP2                              | 4.73×10 <sup>-155</sup> |              |                    |                       |
| rs12535784      | 7                                               | 26,882,067            | Lappalainen2013 | Lymphoblastoid EUR exonlevel, ENSG00000005020.8 | 1.74×10 <sup>-8</sup>   |              |                    |                       |
|                 |                                                 |                       | GTEEx2015_v6    | Thyroid, HOXA5                                  | 4.83×10 <sup>-7</sup>   |              |                    |                       |
|                 |                                                 |                       | GTEEx2015_v6    | Whole Blood, SKAP2                              | 6.05×10 <sup>-6</sup>   |              |                    |                       |
|                 |                                                 |                       | Westra2013      | Whole Blood, SKAP2                              | 7.01×10 <sup>-155</sup> |              |                    |                       |
| rs4719882       | 7                                               | 26,882,252            | Lappalainen2013 | Lymphoblastoid EUR exonlevel, ENSG00000005020.8 | 1.60×10 <sup>-8</sup>   |              |                    |                       |
|                 |                                                 |                       | GTEEx2015_v6    | Thyroid, HOXA5                                  | 3.04×10 <sup>-7</sup>   |              |                    |                       |
|                 |                                                 |                       | GTEEx2015_v6    | Whole Blood, SKAP2                              | 6.58×10 <sup>-6</sup>   |              |                    |                       |
| rs1982995       | 7                                               | 26,884,135            | Lappalainen2013 | Lymphoblastoid EUR exonlevel, ENSG00000005020.8 | 8.99×10 <sup>-7</sup>   |              |                    |                       |
|                 |                                                 |                       | GTEEx2015_v6    | Thyroid, HOXA5                                  | 3.48×10 <sup>-7</sup>   |              |                    |                       |
|                 |                                                 |                       | GTEEx2015_v6    | Whole Blood, SKAP2                              | 5.50×10 <sup>-6</sup>   |              |                    |                       |
| rs10236221      | 7                                               | 26,884,671            | Lappalainen2013 | Lymphoblastoid EUR exonlevel, ENSG00000005020.8 | 1.51×10 <sup>-8</sup>   |              |                    |                       |
|                 |                                                 |                       | GTEEx2015_v6    | Thyroid, HOXA5                                  | 4.87×10 <sup>-7</sup>   |              |                    |                       |
|                 |                                                 |                       | GTEEx2015_v6    | Whole Blood, SKAP2                              | 5.81×10 <sup>-6</sup>   |              |                    |                       |
| rs10270187      | 7                                               | 26,885,885            | Lappalainen2013 | Lymphoblastoid EUR exonlevel, ENSG00000005020.8 | 1.44×10 <sup>-8</sup>   |              |                    |                       |
|                 |                                                 |                       | GTEEx2015_v6    | Thyroid, HOXA5                                  | 4.97×10 <sup>-7</sup>   |              |                    |                       |
|                 |                                                 |                       | GTEEx2015_v6    | Whole Blood, SKAP2                              | 7.15×10 <sup>-6</sup>   |              |                    |                       |
|                 |                                                 |                       | Westra2013      | Whole Blood, SKAP2                              | 7.01×10 <sup>-155</sup> |              |                    |                       |
| rs10227529      | 7                                               | 26,886,309            | Lappalainen2013 | Lymphoblastoid EUR exonlevel, ENSG00000005020.8 | 1.79×10 <sup>-7</sup>   |              |                    |                       |
|                 |                                                 |                       | GTEEx2015_v6    | Thyroid, HOXA5                                  | 5.53×10 <sup>-7</sup>   |              |                    |                       |
|                 |                                                 |                       | GTEEx2015_v6    | Whole Blood, SKAP2                              | 7.09×10 <sup>-6</sup>   |              |                    |                       |
| rs3801813       | 7                                               | 26,887,069            | Lappalainen2013 | Lymphoblastoid EUR exonlevel, ENSG00000005020.8 | 7.77×10 <sup>-9</sup>   |              |                    |                       |
|                 |                                                 |                       | GTEEx2015_v6    | Thyroid, HOXA5                                  | 4.19×10 <sup>-7</sup>   |              |                    |                       |
|                 |                                                 |                       | GTEEx2015_v6    | Whole Blood, SKAP2                              | 6.20×10 <sup>-6</sup>   |              |                    |                       |
|                 |                                                 |                       | Westra2013      | Whole Blood, SKAP2                              | 8.72×10 <sup>-155</sup> |              |                    |                       |
| rs3801812       | 7                                               | 26,887,615            | Lappalainen2013 | Lymphoblastoid EUR exonlevel, ENSG00000005020.8 | 1.62×10 <sup>-8</sup>   |              |                    |                       |
|                 |                                                 |                       | GTEEx2015_v6    | Thyroid, HOXA5                                  | 4.97×10 <sup>-7</sup>   |              |                    |                       |
|                 |                                                 |                       | GTEEx2015_v6    | Whole Blood, SKAP2                              | 7.13×10 <sup>-6</sup>   |              |                    |                       |
|                 |                                                 |                       | Westra2013      | Whole Blood, SKAP2                              | 1.08×10 <sup>-154</sup> |              |                    |                       |

|            |   |            |                 |                                                 |                         |
|------------|---|------------|-----------------|-------------------------------------------------|-------------------------|
| rs10272190 | 7 | 26,887,942 | GTEEx2015_v6    | Thyroid, HOXA5                                  | 4.97×10 <sup>-7</sup>   |
|            |   |            | GTEEx2015_v6    | Whole Blood, SKAP2                              | 7.12×10 <sup>-6</sup>   |
|            |   |            | Lappalainen2013 | Lymphoblastoid EUR exonlevel, ENSG00000005020.8 | 1.58×10 <sup>-8</sup>   |
|            |   |            | Westra2013      | Whole Blood, SKAP2                              | 1.08×10 <sup>-154</sup> |
| rs10227231 | 7 | 26,888,074 | GTEEx2015_v6    | Thyroid, HOXA5                                  | 9.43×10 <sup>-7</sup>   |
|            |   |            | GTEEx2015_v6    | Whole Blood, SKAP2                              | 1.07×10 <sup>-6</sup>   |
|            |   |            | Lappalainen2013 | Lymphoblastoid EUR exonlevel, ENSG00000005020.8 | 1.26×10 <sup>-8</sup>   |
|            |   |            | Westra2013      | Whole Blood, SKAP2                              | 1.08×10 <sup>-154</sup> |
| rs10272457 | 7 | 26,888,155 | GTEEx2015_v6    | Thyroid, HOXA5                                  | 4.97×10 <sup>-7</sup>   |
|            |   |            | GTEEx2015_v6    | Whole Blood, SKAP2                              | 7.11×10 <sup>-6</sup>   |
|            |   |            | Lappalainen2013 | Lymphoblastoid EUR exonlevel, ENSG00000005020.8 | 1.51×10 <sup>-8</sup>   |
|            |   |            | Westra2013      | Whole Blood, SKAP2                              | 1.08×10 <sup>-154</sup> |
| rs10272603 | 7 | 26,888,277 | GTEEx2015_v6    | Thyroid, HOXA5                                  | 4.97×10 <sup>-7</sup>   |
|            |   |            | GTEEx2015_v6    | Whole Blood, SKAP2                              | 7.11×10 <sup>-6</sup>   |
|            |   |            | Lappalainen2013 | Lymphoblastoid EUR exonlevel, ENSG00000005020.8 | 1.65×10 <sup>-8</sup>   |
|            |   |            | GTEEx2015_v6    | Thyroid, HOXA5                                  | 2.92×10 <sup>-7</sup>   |
| rs6461979  | 7 | 26,888,918 | GTEEx2015_v6    | Whole Blood, SKAP2                              | 1.51×10 <sup>-7</sup>   |
|            |   |            | Lappalainen2013 | Lymphoblastoid EUR exonlevel, ENSG00000005020.8 | 1.49×10 <sup>-8</sup>   |
|            |   |            | Westra2013      | Whole Blood, SKAP2                              | 1.35×10 <sup>-154</sup> |
|            |   |            | GTEEx2015_v6    | Thyroid, HOXA5                                  | 3.35×10 <sup>-7</sup>   |
| rs17376018 | 7 | 26,889,862 | GTEEx2015_v6    | Whole Blood, SKAP2                              | 1.03×10 <sup>-5</sup>   |
|            |   |            | Lappalainen2013 | Lymphoblastoid EUR exonlevel, ENSG00000005020.8 | 1.41×10 <sup>-8</sup>   |
|            |   |            | GTEEx2015_v6    | Thyroid, HOXA5                                  | 4.45×10 <sup>-7</sup>   |
|            |   |            | GTEEx2015_v6    | Whole Blood, SKAP2                              | 6.36×10 <sup>-6</sup>   |
| rs4722647  | 7 | 26,890,446 | Lappalainen2013 | Lymphoblastoid EUR exonlevel, ENSG00000005020.8 | 1.10×10 <sup>-8</sup>   |
|            |   |            | GTEEx2015_v6    | Thyroid, HOXA5                                  | 4.68×10 <sup>-7</sup>   |
|            |   |            | GTEEx2015_v6    | Whole Blood, SKAP2                              | 6.78×10 <sup>-6</sup>   |
|            |   |            | Lappalainen2013 | Lymphoblastoid EUR exonlevel, ENSG00000005020.8 | 1.37×10 <sup>-8</sup>   |
| rs3934268  | 7 | 26,890,572 | GTEEx2015_v6    | Thyroid, HOXA5                                  | 4.67×10 <sup>-7</sup>   |
|            |   |            | GTEEx2015_v6    | Whole Blood, SKAP2                              | 6.78×10 <sup>-6</sup>   |
|            |   |            | Lappalainen2013 | Lymphoblastoid EUR exonlevel, ENSG00000005020.8 | 1.31×10 <sup>-8</sup>   |
|            |   |            | Westra2013      | Whole Blood, SKAP2                              | 1.35×10 <sup>-154</sup> |
| rs2031811  | 7 | 26,890,672 | GTEEx2015_v6    | Thyroid, HOXA5                                  | 4.69×10 <sup>-7</sup>   |
|            |   |            | Lappalainen2013 | Lymphoblastoid EUR exonlevel, ENSG00000005020.8 | 8.30×10 <sup>-9</sup>   |
|            |   |            | Westra2013      | Whole Blood, SKAP2                              | 4.99×10 <sup>-141</sup> |
|            |   |            | GTEEx2015_v6    | Thyroid, HOXA5                                  | 4.67×10 <sup>-7</sup>   |
| rs2030136  | 7 | 26,891,016 | GTEEx2015_v6    | Whole Blood, SKAP2                              | 6.78×10 <sup>-6</sup>   |
|            |   |            | Lappalainen2013 | Lymphoblastoid EUR exonlevel, ENSG00000005020.8 | 9.69×10 <sup>-9</sup>   |
|            |   |            | Westra2013      | Whole Blood, SKAP2                              | 6.51×10 <sup>-155</sup> |
|            |   |            | GTEEx2015_v6    | Thyroid, HOXA5                                  | 8.76×10 <sup>-7</sup>   |
| rs7804356  | 7 | 26,891,665 | Lappalainen2013 | Lymphoblastoid EUR exonlevel, ENSG00000005020.8 | 1.18×10 <sup>-8</sup>   |
|            |   |            | GTEEx2015_v6    | Thyroid, HOXA5                                  | 2.75×10 <sup>-7</sup>   |
|            |   |            | GTEEx2015_v6    | Whole Blood, SKAP2                              | 1.43×10 <sup>-7</sup>   |
|            |   |            | Lappalainen2013 | Lymphoblastoid EUR exonlevel, ENSG00000005020.8 | 1.64×10 <sup>-8</sup>   |
| rs7804620  | 7 | 26,891,831 | GTEEx2015_v6    | Thyroid, HOXA5                                  | 4.67×10 <sup>-7</sup>   |
|            |   |            | GTEEx2015_v6    | Whole Blood, SKAP2                              | 6.75×10 <sup>-6</sup>   |
|            |   |            | Lappalainen2013 | Lymphoblastoid EUR exonlevel, ENSG00000005020.8 | 1.69×10 <sup>-8</sup>   |
|            |   |            | Westra2013      | Whole Blood, SKAP2                              | 1.35×10 <sup>-154</sup> |
| rs73069533 | 7 | 26,892,325 | GTEEx2015_v6    | Thyroid, HOXA5                                  | 4.59×10 <sup>-7</sup>   |
|            |   |            | GTEEx2015_v6    | Whole Blood, SKAP2                              | 8.97×10 <sup>-6</sup>   |
|            |   |            | Lappalainen2013 | Lymphoblastoid EUR exonlevel, ENSG00000005020.8 | 1.69×10 <sup>-8</sup>   |
|            |   |            | Westra2013      | Whole Blood, SKAP2                              | 1.35×10 <sup>-154</sup> |
| rs10486483 | 7 | 26,892,440 | GTEEx2015_v6    | Thyroid, HOXA5                                  | 4.68×10 <sup>-7</sup>   |
|            |   |            | GTEEx2015_v6    | Whole Blood, SKAP2                              | 6.74×10 <sup>-6</sup>   |
|            |   |            | Lappalainen2013 | Lymphoblastoid EUR exonlevel, ENSG00000005020.8 | 1.44×10 <sup>-8</sup>   |
|            |   |            | GTEEx2015_v6    | Thyroid, HOXA5                                  | 4.59×10 <sup>-7</sup>   |
| rs3801810  | 7 | 26,892,531 | GTEEx2015_v6    | Whole Blood, SKAP2                              | 8.97×10 <sup>-6</sup>   |
|            |   |            | Lappalainen2013 | Lymphoblastoid EUR exonlevel, ENSG00000005020.8 | 1.69×10 <sup>-8</sup>   |
|            |   |            | Westra2013      | Whole Blood, SKAP2                              | 1.35×10 <sup>-154</sup> |
|            |   |            | GTEEx2015_v6    | Thyroid, HOXA5                                  | 4.68×10 <sup>-7</sup>   |
| rs3823928  | 7 | 26,893,317 | GTEEx2015_v6    | Whole Blood, SKAP2                              | 6.74×10 <sup>-6</sup>   |
|            |   |            | Lappalainen2013 | Lymphoblastoid EUR exonlevel, ENSG00000005020.8 | 1.44×10 <sup>-8</sup>   |
|            |   |            | GTEEx2015_v6    | Thyroid, HOXA5                                  | 4.68×10 <sup>-7</sup>   |
|            |   |            | GTEEx2015_v6    | Whole Blood, SKAP2                              | 6.74×10 <sup>-6</sup>   |

|            |   |            |                 |                                                 |             |
|------------|---|------------|-----------------|-------------------------------------------------|-------------|
| rs7791513  | 7 | 26,893,357 | GTEEx2015_v6    | Thyroid, HOXA5                                  | 5.40×10-7   |
|            |   |            | GTEEx2015_v6    | Whole Blood, SKAP2                              | 6.40×10-6   |
|            |   |            | Lappalainen2013 | Lymphoblastoid EUR exonlevel, ENSG00000005020.8 | 1.42×10-8   |
|            |   |            | Westra2013      | Whole Blood, SKAP2                              | 1.35×10-154 |
| rs3213853  | 7 | 26,893,524 | GTEEx2015_v6    | Thyroid, HOXA5                                  | 4.68×10-7   |
|            |   |            | GTEEx2015_v6    | Whole Blood, SKAP2                              | 6.74×10-6   |
|            |   |            | Lappalainen2013 | Lymphoblastoid EUR exonlevel, ENSG00000005020.8 | 1.32×10-8   |
| rs6461980  | 7 | 26,894,123 | GTEEx2015_v6    | Thyroid, HOXA5                                  | 4.68×10-7   |
|            |   |            | GTEEx2015_v6    | Whole Blood, SKAP2                              | 6.70×10-6   |
|            |   |            | Lappalainen2013 | Lymphoblastoid EUR exonlevel, ENSG00000005020.8 | 1.40×10-8   |
| rs12536145 | 7 | 26,894,860 | GTEEx2015_v6    | Thyroid, HOXA5                                  | 4.69×10-7   |
|            |   |            | GTEEx2015_v6    | Whole Blood, SKAP2                              | 6.22×10-6   |
|            |   |            | Lappalainen2013 | Lymphoblastoid EUR exonlevel, ENSG00000005020.8 | 1.31×10-8   |
| rs10242572 | 7 | 26,895,065 | GTEEx2015_v6    | Thyroid, HOXA5                                  | 4.70×10-7   |
|            |   |            | GTEEx2015_v6    | Whole Blood, SKAP2                              | 6.83×10-6   |
|            |   |            | Lappalainen2013 | Lymphoblastoid EUR exonlevel, ENSG00000005020.8 | 2.09×10-8   |
|            |   |            | Westra2013      | Whole Blood, SKAP2                              | 9.34×10-143 |
| rs10256250 | 7 | 26,895,080 | GTEEx2015_v6    | Thyroid, HOXA5                                  | 4.70×10-7   |
|            |   |            | GTEEx2015_v6    | Whole Blood, SKAP2                              | 6.07×10-6   |
|            |   |            | Lappalainen2013 | Lymphoblastoid EUR exonlevel, ENSG00000005020.8 | 1.53×10-8   |
|            |   |            | Westra2013      | Whole Blood, SKAP2                              | 1.35×10-154 |
| rs3801809  | 7 | 26,895,456 | GTEEx2015_v6    | Thyroid, HOXA5                                  | 4.73×10-7   |
|            |   |            | GTEEx2015_v6    | Whole Blood, SKAP2                              | 5.56×10-6   |
|            |   |            | Lappalainen2013 | Lymphoblastoid EUR exonlevel, ENSG00000005020.8 | 1.29×10-8   |
| rs3801808  | 7 | 26,896,555 | GTEEx2015_v6    | Thyroid, HOXA5                                  | 4.92×10-7   |
|            |   |            | GTEEx2015_v6    | Whole Blood, SKAP2                              | 4.36×10-6   |
|            |   |            | Lappalainen2013 | Lymphoblastoid EUR exonlevel, ENSG00000005020.8 | 3.77×10-8   |
|            |   |            | Westra2013      | Whole Blood, SKAP2                              | 2.11×10-150 |
| rs3801807  | 7 | 26,897,439 | GTEEx2015_v6    | Thyroid, HOXA5                                  | 4.91×10-7   |
|            |   |            | GTEEx2015_v6    | Whole Blood, SKAP2                              | 4.34×10-6   |
|            |   |            | Lappalainen2013 | Lymphoblastoid EUR exonlevel, ENSG00000005020.8 | 1.32×10-8   |
|            |   |            | Westra2013      | Whole Blood, SKAP2                              | 1.16×10-154 |
| rs3801805  | 7 | 26,897,640 | GTEEx2015_v6    | Thyroid, HOXA5                                  | 1.63×10-6   |
|            |   |            | GTEEx2015_v6    | Whole Blood, SKAP2                              | 2.40×10-6   |
|            |   |            | Lappalainen2013 | Lymphoblastoid EUR exonlevel, ENSG00000005020.8 | 1.81×10-8   |
|            |   |            | Westra2013      | Whole Blood, SKAP2                              | 1.35×10-154 |
| rs10486485 | 7 | 26,900,356 | GTEEx2015_v6    | Thyroid, HOXA5                                  | 1.05×10-6   |
|            |   |            | GTEEx2015_v6    | Whole Blood, SKAP2                              | 5.74×10-7   |
|            |   |            | Lappalainen2013 | Lymphoblastoid EUR exonlevel, ENSG00000005020.8 | 3.82×10-8   |
|            |   |            | Westra2013      | Whole Blood, SKAP2                              | 7.16×10-155 |
| rs3801803  | 7 | 26,901,740 | GTEEx2015_v6    | Thyroid, HOXA5                                  | 8.85×10-7   |
|            |   |            | GTEEx2015_v6    | Whole Blood, SKAP2                              | 1.41×10-6   |
|            |   |            | Lappalainen2013 | Lymphoblastoid EUR exonlevel, ENSG00000005020.8 | 2.58×10-8   |
|            |   |            | Westra2013      | Whole Blood, SKAP2                              | 7.16×10-155 |
| rs73069539 | 7 | 26,903,661 | GTEEx2015_v6    | Thyroid, HOXA5                                  | 4.23×10-7   |
|            |   |            | GTEEx2015_v6    | Whole Blood, SKAP2                              | 6.23×10-9   |
|            |   |            | Lappalainen2013 | Lymphoblastoid EUR exonlevel, ENSG00000005020.8 | 5.06×10-8   |
| rs17323934 | 7 | 26,904,330 | GTEEx2015_v6    | Thyroid, HOXA5                                  | 7.33×10-7   |
|            |   |            | GTEEx2015_v6    | Whole Blood, SKAP2                              | 9.46×10-9   |
|            |   |            | Lappalainen2013 | Lymphoblastoid EUR exonlevel, ENSG00000005020.8 | 3.67×10-9   |
|            |   |            | Westra2013      | Whole Blood, SKAP2                              | 1.58×10-161 |
| rs73069540 | 7 | 26,904,770 | GTEEx2015_v6    | Thyroid, HOXA5                                  | 3.72×10-7   |
|            |   |            | GTEEx2015_v6    | Whole Blood, SKAP2                              | 5.40×10-9   |
|            |   |            | Lappalainen2013 | Lymphoblastoid EUR exonlevel, ENSG00000005020.8 | 2.54×10-9   |
| rs73069541 | 7 | 26,904,928 | GTEEx2015_v6    | Thyroid, HOXA5                                  | 3.71×10-7   |
|            |   |            | GTEEx2015_v6    | Whole Blood, SKAP2                              | 5.29×10-9   |
|            |   |            | Lappalainen2013 | Lymphoblastoid EUR exonlevel, ENSG00000005020.8 | 2.24×10-9   |



|            |   |            |                 |                                                 |                         |
|------------|---|------------|-----------------|-------------------------------------------------|-------------------------|
| rs12540388 | 7 | 26,905,731 | GTEX2015_v6     | Thyroid, HOXA5                                  | 3.60×10 <sup>-7</sup>   |
|            |   |            | GTEX2015_v6     | Whole Blood, SKAP2                              | 4.85×10 <sup>-9</sup>   |
|            |   |            | Lappalainen2013 | Lymphoblastoid EUR exonlevel, ENSG00000005020.8 | 3.00×10 <sup>-9</sup>   |
|            |   |            | Westra2013      | Whole Blood, SKAP2                              | 3.49×10 <sup>-163</sup> |
| rs2391362  | 7 | 26,907,123 | GTEX2015_v6     | Thyroid, HOXA5                                  | 3.35×10 <sup>-7</sup>   |
|            |   |            | GTEX2015_v6     | Whole Blood, SKAP2                              | 5.01×10 <sup>-9</sup>   |
|            |   |            | Lappalainen2013 | Lymphoblastoid EUR exonlevel, ENSG00000005020.8 | 4.56×10 <sup>-9</sup>   |
|            |   |            | Westra2013      | Whole Blood, SKAP2                              | 1.64×10 <sup>-162</sup> |
| rs76438067 | 7 | 26,911,904 | GTEX2015_v6     | Thyroid, HOXA5                                  | 4.30×10 <sup>-7</sup>   |
|            |   |            | GTEX2015_v6     | Whole Blood, SKAP2                              | 2.29×10 <sup>-9</sup>   |
|            |   |            | Lappalainen2013 | Lymphoblastoid EUR exonlevel, ENSG00000005020.8 | 3.77×10 <sup>-9</sup>   |

## \*eQTL resources used by HaploReg

| id              | pmid     | name                                                                                              | source                                                                                                                                                                                                                                                                             |
|-----------------|----------|---------------------------------------------------------------------------------------------------|------------------------------------------------------------------------------------------------------------------------------------------------------------------------------------------------------------------------------------------------------------------------------------|
| Montgomery2010  | 20220756 | Transcriptome genetics using second generation sequencing in a Caucasian population               | From NCBI eQTL Browser, <a href="http://www.ncbi.nlm.nih.gov/projects/gap/eqtl/index.cgi">http://www.ncbi.nlm.nih.gov/projects/gap/eqtl/index.cgi</a>                                                                                                                              |
| Schadt2008      | 18462017 | Mapping the genetic architecture of gene expression in human liver                                | From NCBI eQTL Browser, <a href="http://www.ncbi.nlm.nih.gov/projects/gap/eqtl/index.cgi">http://www.ncbi.nlm.nih.gov/projects/gap/eqtl/index.cgi</a>                                                                                                                              |
| Gibbs2010       | 20485568 | Abundant quantitative trait loci exist for DNA methylation and gene expression in human brain     | From NCBI eQTL Browser, <a href="http://www.ncbi.nlm.nih.gov/projects/gap/eqtl/index.cgi">http://www.ncbi.nlm.nih.gov/projects/gap/eqtl/index.cgi</a>                                                                                                                              |
| Stranger2008    | 17873874 | Population genomics of human gene expression                                                      | From NCBI eQTL Browser, <a href="http://www.ncbi.nlm.nih.gov/projects/gap/eqtl/index.cgi">http://www.ncbi.nlm.nih.gov/projects/gap/eqtl/index.cgi</a>                                                                                                                              |
| GTEX2015_v6     | 25954001 | The Genotype-Tissue Expression (GTEx) pilot analysis: Multitissue gene regulation in humans       | From GTEx Portal, Release v6, from <a href="http://www.gtexportal.org/static/datasets/gtex_analysis_v6/single_tissue_eqtl_data/GTex_Analysis_V6_eQTLs.tar.gz">http://www.gtexportal.org/static/datasets/gtex_analysis_v6/single_tissue_eqtl_data/GTex_Analysis_V6_eQTLs.tar.gz</a> |
| Li2014          | 24907074 | Expression QTL-based analyses reveal candidate causal genes and loci across five tumor types      | From Table S1. cis-eQTL for mRNA were exported from each tab of the Excel file.                                                                                                                                                                                                    |
| Westra2013      | 24013639 | Systematic identification of trans eQTLs as putative drivers of known disease associations        | All associations from 2012-12-21-CisAssociationsProbeLevelFDR0.5.txt                                                                                                                                                                                                               |
| Hao2012         | 23209423 | Lung eQTLs to help reveal the molecular underpinnings of asthma                                   | All cis and trans eQTLs from Tables S2A and S2B were combined in the provided Excel and the p value in the field "pvalue.fix" was used                                                                                                                                             |
| Koopmann2014    | 24846176 | Genome-wide identification of expression quantitative trait loci (eQTLs) in human heart           | All associations from Table S1                                                                                                                                                                                                                                                     |
| Fairfax2014     | 24604202 | Innate immune activity conditions the effect of regulatory variants upon monocyte gene expression | All associations from Tables S2B and S3B. Tables were flattened by the four treatments and filtered for "NA" reported as a p-value.                                                                                                                                                |
| Grundberg2011   | 21283786 | Global Analysis of the Impact of Environmental Perturbation on cis-Regulation of Gene Expression  | All associations from Table S6                                                                                                                                                                                                                                                     |
| Lappalainen2013 | 24037378 | Transcriptome and genome sequencing uncovers functional variation in humans                       | All gene- and exon-level eQTLs from EUR and YRI. Gene-level eQTL genes are translated from ENSG to HGNC names when possible; exons are named by probe name.                                                                                                                        |
| Ramasamy2014    | 25174007 | Genetic variability in the regulation of gene expression in ten regions of the human brain        | All associations reported in Table S2                                                                                                                                                                                                                                              |

**SNP:** SNP rs ID; **CHR:** Chromosome; **BP:** position (NCBI build 37/hg19 coordinates) of SNP marker; **eQTL resource id:** publication that reports SNP as eQTL; **Selected eQTL hits:** selection of eQTL hits, shown are cell types/tissues and the respective gene; **P-val:** *P*-value of eQTL for the respective gene in the respective cell type/tissue.

**Supplementary Table 7. Gene expression of genes *EFEMP1*, *SKAP2* and *KCNH8* across multiple tissues/cell lines from ENCODE data.**

Expression data was obtained from website [http://promoter.bx.psu.edu/ENCODE/search\\_human.php](http://promoter.bx.psu.edu/ENCODE/search_human.php).

| tissues/ cell lines          | cell    | Description                                               | RPKM <sub>EFEMP1</sub> | RPKM <sub>SKAP2</sub> | RPKM <sub>KCNH8</sub> |
|------------------------------|---------|-----------------------------------------------------------|------------------------|-----------------------|-----------------------|
| A549_cell_longNonPolyA       | A549    | epithelial cell line derived from a lung carcinoma tissue | 17.08                  | 2.83                  | 0.00                  |
| A549_cell_longPolyA          |         |                                                           | 42.21                  | 17.01                 | 0.00                  |
| A549_cytosol_longPolyA       |         |                                                           | 55.50                  | 5.02                  | 0.00                  |
| A549_nucleus_longPolyA       |         |                                                           | 53.59                  | 1.38                  | 0.00                  |
| AG04450_cell_longNonPolyA    | AG04450 | fetal lung fibroblast                                     | 93.71                  | 4.50                  | 0.00                  |
| AG04450_cell_longPolyA       |         |                                                           | 352.58                 | 13.02                 | 0.00                  |
| BJ_cell_longNonPolyA         | BJ      | skin fibroblast                                           | 273.33                 | 1.04                  | 0.00                  |
| BJ_cell_longPolyA            |         |                                                           | 1124.11                | 3.90                  | 0.00                  |
| CD20_Plus_cell_longNonPolyA  | CD20+   | B cells                                                   | 0.00                   | 9.58                  | 4.77                  |
| CD20_Plus_cell_longPolyA     |         |                                                           | 0.00                   | 11.93                 | 13.12                 |
| GM12878_cell_longNonPolyA    | GM12878 | B-lymphocyte, lymphoblastoid                              | 1.73                   | 3.24                  | 0.00                  |
| GM12878_cell_longPolyA       |         |                                                           | 0.51                   | 18.12                 | 0.04                  |
| GM12878_cytosol_longNonPolyA |         |                                                           | 0.00                   | 1.20                  | 0.00                  |
| GM12878_cytosol_longPolyA    |         |                                                           | 0.84                   | 9.24                  | 0.00                  |
| GM12878_nucleolus_total      |         |                                                           | 0.13                   | 2.83                  | 0.00                  |
| GM12878_nucleus_longNonPolyA |         |                                                           | 0.70                   | 4.59                  | 0.05                  |
| GM12878_nucleus_longPolyA    |         |                                                           | 0.58                   | 2.74                  | 0.05                  |
| H1_hESC_cell_longNonPolyA    | H1-hESC | embryonic stem cells                                      | 20.87                  | 0.32                  | 6.60                  |
| H1_hESC_cell_longPolyA       |         |                                                           | 19.29                  | 0.60                  | 3.09                  |
| HAoAF_cell_total             | HAoAF   | Aortic Adventitial Fibroblasts                            | 216.59                 | 7.72                  | 0.00                  |
| HAoEC_cell_total             | HAoEC   | Aortic Endothelial Cells (thoracic)                       | 565.17                 | 11.85                 | 0.00                  |
| HAoSMC_cell_total            | HAoSMC  | Human Aortic Smooth Muscle Cells                          | 694.76                 | 0.79                  | 0.00                  |
| HBdMEC_cell_total            | HBdMEC  | Human Bladder Microvascular Endothelial Cells             | 4649.97                | 11.11                 | 0.00                  |
| HBdSMC_cell_total            | HBdSMC  | Human Bladder Smooth Muscle Cells                         | 269.47                 | 3.17                  | 0.00                  |
| HBepC_cell_total             | HBepC   | Human Bronchial Epithelial Cells                          | 36.44                  | 0.93                  | 0.00                  |
| HBSMC_cell_total             | HBSMC   | Human Bronchial Smooth Muscle Cells                       | 281.68                 | 3.90                  | 0.00                  |
| HCAEC_cell_total             | HCAEC   | Human Coronary Artery Endothelial Cells                   | 1332.16                | 5.90                  | 0.00                  |
| HCASMC_cell_total            | HCASMC  | Human Coronary Artery Smooth Muscle Cells                 | 1929.37                | 0.43                  | 0.00                  |

|                              |         |                                                                                  |         |       |      |
|------------------------------|---------|----------------------------------------------------------------------------------|---------|-------|------|
| HCH_cell_total               | HCH     | Undifferentiated Chondrocytes                                                    | 1068.59 | 1.34  | 0.00 |
| HCM_cell_total               | HCM     | Human Cardiac Myocytes                                                           | 939.91  | 1.01  | 0.00 |
| HDBEC_cell_total             | HDBEC   | Human Dermal Blood Endothelial Cells                                             | 5896.16 | 17.95 | 0.02 |
| HDLEC_cell_total             | HDLEC   | Human Dermal Lymphatic Endothelial Cells                                         | 1031.65 | 9.53  | 0.00 |
| HDMEC_cell_total             | HDMEC   | Human Dermal Microvascular Endothelial Cells                                     | 2030.59 | 7.00  | 0.00 |
| HeLa_S3_cell_longNonPolyA    | HeLa-S3 | cervical carcinoma                                                               | 0.00    | 1.24  | 0.00 |
| HeLa_S3_cell_longPolyA       |         |                                                                                  | 89.60   | 4.08  | 0.00 |
| HeLa_S3_cytosol_longPolyA    |         |                                                                                  | 95.21   | 2.90  | 0.00 |
| HeLa_S3_nucleus_longNonPolyA |         |                                                                                  | 19.14   | 1.62  | 0.00 |
| HeLa_S3_nucleus_longPolyA    |         |                                                                                  | 60.50   | 0.51  | 0.00 |
| HepG2_cell_longNonPolyA      | HepG2   | hepatocellular carcinoma                                                         | 0.00    | 1.38  | 0.00 |
| HepG2_cell_longPolyA         |         |                                                                                  | 0.00    | 3.49  | 0.00 |
| HepG2_cytosol_longNonPolyA   |         |                                                                                  | 0.00    | 1.48  | 0.00 |
| HepG2_cytosol_longPolyA      |         |                                                                                  | 0.00    | 3.06  | 0.00 |
| HepG2_nucleus_longNonPolyA   |         |                                                                                  | 0.22    | 2.49  | 0.00 |
| HepG2_nucleus_longPolyA      |         |                                                                                  | 0.00    | 0.80  | 0.00 |
| HFDPC_cell_total             | HFDPC   | Follicle Dermal Papilla Cells                                                    | 30.68   | 3.01  | 0.00 |
| hMSC_AT_cell_total           | hMSC-AT | Undifferentiated Mesenchymal Stem Cells from subcutaneous abdomen adipose tissue | 30.54   | 9.13  | 0.00 |
| hMSC_BM_cell_total           | hMSC-BM | Undifferentiated Mesenchymal Stem Cells from femoral head                        | 7.10    | 7.27  | 0.00 |
| hMSC_UC_cell_total           | hMSC-UC | Undifferentiated Mesenchymal Stem Cells from matrix (Wharton's Jelly)            | 6.71    | 7.42  | 0.00 |
| HNEpC_cell_total             |         |                                                                                  | 93.39   | 4.02  | 0.00 |
| HOB_cell_total               | HOB     | Undifferentiated Osteoblasts femoral head                                        | 422.49  | 6.06  | 0.00 |
| HPAEC_cell_total             | HPAEC   | Human Pulmonary Artery Endothelial Cells                                         | 3247.85 | 9.84  | 0.00 |
| HPASMC_cell_total            | HPASMC  | Human Pulmonary Artery Smooth Muscle Cells                                       | 1547.67 | 4.19  | 0.00 |
| HPC_PL_cell_total            | HPC-PL  | Undifferentiated Pericytes                                                       | 4.98    | 2.37  | 0.00 |
| HPF_cell_total               | HPF     | Human Pulmonary Fibroblasts                                                      | 258.70  | 8.53  | 0.00 |
| HPIEpC_cell_total            | HPIEpC  | Placental Epithelial Cells amniotic membrane                                     | 104.99  | 4.18  | 0.00 |
| HPMEC_cell_total             | HPMEC   | Human Pulmonary Microvascular Endothelial Cells                                  | 4270.35 | 7.02  | 0.00 |
| HRCEpC_cell_total            | HRCEpC  | Human Renal Cortical Epithelial Cells                                            | 125.07  | 31.05 | 0.00 |
| HSaVEC_cell_total            | HSaVEC  | Saphenous Vein Endothelial Cells from thigh                                      | 1336.69 | 11.39 | 0.00 |
| HSMM_cell_longNonPolyA       | HSMM    | Human Skeletal Muscle Myoblast                                                   | 281.80  | 0.38  | 0.00 |
| HSMM_cell_longPolyA          |         |                                                                                  | 1147.55 | 2.37  | 0.00 |

|                                       |                 |                                                                                            |         |       |      |
|---------------------------------------|-----------------|--------------------------------------------------------------------------------------------|---------|-------|------|
| HTEpC_cell_total                      | HTEpC           | Human Tracheal Epithelial Cells                                                            | 88.08   | 4.24  | 0.00 |
| HTSMC_cell_total                      | HTSMC           | Human Tracheal Smooth Muscle Cells                                                         | 143.50  | 7.33  | 0.00 |
| HUAEC_cell_total                      | HUAEC           | Human Aortic Endothelial Cells                                                             | 651.03  | 3.35  | 0.00 |
| HUASMC_cell_total                     | HUASMC          | Human Umbilical Artery Smooth Muscle Cells                                                 | 47.92   | 6.03  | 0.00 |
| HUtSMC_cell_total                     | HUtSMC          | Human Uterine Smooth Muscle Cells                                                          | 4.04    | 3.22  | 0.00 |
| HUVEC_cell_longNonPolyA               | HUVEC           | umbilical vein endothelial cells                                                           | 3868.04 | 2.53  | 0.00 |
| HUVEC_cell_longPolyA                  |                 |                                                                                            | 7680.14 | 3.20  | 0.00 |
| HUVEC_cytosol_longPolyA               |                 |                                                                                            | 7580.66 | 7.87  | 0.00 |
| HUVEC_nucleus_longNonPolyA            |                 |                                                                                            | 970.35  | 2.82  | 0.00 |
| HUVEC_nucleus_longPolyA               |                 |                                                                                            | 2714.06 | 2.84  | 0.00 |
| HVMF_cell_total                       | HVMF            | villous mesenchymal fibroblast cells                                                       | 6.10    | 3.42  | 0.00 |
| HWP_cell_total                        | HWP             | Undifferentiated White Preadipocytes, subcutaneous adipose tissue from abdomen / upper arm | 25.77   | 10.94 | 0.00 |
| IMR90_cell_longPolyA                  | IMR90           | fetal lung fibroblasts                                                                     | 192.50  | 6.78  | 0.00 |
| IMR90_cell_total                      |                 |                                                                                            | 123.90  | 3.79  | 0.00 |
| IMR90_cytosol_longPolyA               |                 |                                                                                            | 186.03  | 2.40  | 0.00 |
| IMR90_nucleus_longPolyA               |                 |                                                                                            | 49.86   | 0.36  | 0.00 |
| K562_cell_longNonPolyA                | K562            | leukemia                                                                                   | 0.81    | 1.53  | 0.00 |
| K562_cell_longPolyA                   |                 |                                                                                            | 4.74    | 4.43  | 0.00 |
| K562_chromatin_total                  |                 |                                                                                            | 0.37    | 1.23  | 0.00 |
| K562_cytosol_longNonPolyA             |                 |                                                                                            | 0.00    | 0.46  | 0.00 |
| K562_cytosol_longPolyA                |                 |                                                                                            | 1.40    | 1.50  | 0.00 |
| K562_nucleolus_total                  |                 |                                                                                            | 0.59    | 0.38  | 0.00 |
| K562_nucleoplasm_total                |                 |                                                                                            | 0.41    | 0.85  | 0.00 |
| K562_nucleus_longNonPolyA             |                 |                                                                                            | 0.46    | 0.89  | 0.00 |
| K562_nucleus_longPolyA                |                 |                                                                                            | 0.28    | 0.36  | 0.00 |
| Liver_STL004_Liver_STL011_cell_total  |                 | Liver                                                                                      | 3.63    | 1.77  | 0.06 |
| MCF_7_cell_longNonPolyA               | MCF-7           | mammary gland, adenocarcinoma                                                              | 10.68   | 0.43  | 0.00 |
| MCF_7_cell_longPolyA                  |                 |                                                                                            | 14.85   | 14.35 | 0.00 |
| MCF_7_cytosol_longPolyA               |                 |                                                                                            | 20.45   | 11.04 | 0.00 |
| MCF_7_nucleus_longPolyA               |                 |                                                                                            | 6.19    | 3.88  | 0.03 |
| Monocytes_CD14_Plus_cell_longNonPolyA | Monocytes-CD14+ | Monocytes-CD14+ are CD14-positive cells from human leukapheresis production                | 0.00    | 6.62  | 0.00 |
| Monocytes_CD14_Plus_cell_longPolyA    |                 |                                                                                            | 0.00    | 8.48  | 0.00 |
| NHDF_cell_total                       | NHDF            | Dermal Fibroblasts from temple / breast                                                    | 8.06    | 9.32  | 0.00 |

|                              |            |                                                                       |         |       |      |
|------------------------------|------------|-----------------------------------------------------------------------|---------|-------|------|
| NHEK_cell_longNonPolyA       | NHEK       | epidermal keratinocytes                                               | 95.88   | 4.13  | 0.00 |
| NHEK_cell_longPolyA          |            |                                                                       | 195.39  | 12.39 | 0.00 |
| NHEK_cytosol_longPolyA       |            |                                                                       | 96.90   | 10.77 | 0.00 |
| NHEK_nucleus_longNonPolyA    |            |                                                                       | 26.50   | 4.34  | 0.00 |
| NHEK_nucleus_longPolyA       |            |                                                                       | 132.83  | 7.81  | 0.00 |
| NHEM_f_M2_cell_total         | NHEM.f_M2  | Epidermal Melanocytes from foreskin                                   | 3.77    | 2.27  | 0.00 |
| NHEM_M2_cell_total           | NHEM_M2    | Epidermal Melanocytes (adult) from cheek / temple                     | 2.84    | 2.66  | 0.28 |
| NHLF_cell_longNonPolyA       | NHLF       | Normal Human Lung Fibroblasts                                         | 88.40   | 0.67  | 0.00 |
| NHLF_cell_longPolyA          |            |                                                                       | 416.63  | 14.80 | 0.00 |
| SK_N_SH_cell_longPolyA       | SK-N-SH    | neuroblastoma                                                         | 1042.44 | 0.93  | 0.05 |
| SK_N_SH_cytosol_longPolyA    |            |                                                                       | 1098.83 | 1.46  | 0.15 |
| SK_N_SH_nucleus_longPolyA    |            |                                                                       | 467.35  | 0.26  | 0.16 |
| SK_N_SH_RA_cell_longNonPolyA | SK-N-SH_RA | neuroblastoma cell line, treatment: differentiated with retinoic acid | 26.23   | 0.29  | 1.70 |
| SK_N_SH_RA_cell_longPolyA    |            |                                                                       | 91.36   | 1.96  | 1.89 |
| SkMC_cell_total              | SKMC       | skeletal muscle cells                                                 | 74.16   | 12.48 | 0.00 |

**RPKM**: reads per kilobase per million mapped reads

**Supplementary Table 8. Regulatory features of three newly identified disease associations and all variants in high LD ( $r^2 > 0.8$ ) with these variants.** All variants were annotated using CADD<sup>1</sup> v1.3 (GRCh37/hg19;), MutationTaster<sup>3</sup> (NCBI build 37, Ensemble 69) and HaploReg<sup>4</sup> v4.1 to determine regulatory features including chromatin state, protein binding annotation and the effect of SNPs on regulatory motifs (**Methods**).











| Gene                                                                                                                                                                                                                                                                                                                  | Transcript                                                                                                                                                               | Region                                                                                                                                                                                                                                                                                                                                                                                                                                                                                                                                                                                                                                                                  | Strand                                                                                                                                                                                                                                                                                                                                                                                                                                                                                                                                                                                                                                                                                                                                                                                                                                                                                                                                                                                                                                                                                                                                                                                                                                                                                                                                                                                                                                                                                                                                                                                                                                         | Start | End   | Score | Chrom  | Strand | Start   | End      | Score | Chrom   | Strand | Start | End | Score |
|-----------------------------------------------------------------------------------------------------------------------------------------------------------------------------------------------------------------------------------------------------------------------------------------------------------------------|--------------------------------------------------------------------------------------------------------------------------------------------------------------------------|-------------------------------------------------------------------------------------------------------------------------------------------------------------------------------------------------------------------------------------------------------------------------------------------------------------------------------------------------------------------------------------------------------------------------------------------------------------------------------------------------------------------------------------------------------------------------------------------------------------------------------------------------------------------------|------------------------------------------------------------------------------------------------------------------------------------------------------------------------------------------------------------------------------------------------------------------------------------------------------------------------------------------------------------------------------------------------------------------------------------------------------------------------------------------------------------------------------------------------------------------------------------------------------------------------------------------------------------------------------------------------------------------------------------------------------------------------------------------------------------------------------------------------------------------------------------------------------------------------------------------------------------------------------------------------------------------------------------------------------------------------------------------------------------------------------------------------------------------------------------------------------------------------------------------------------------------------------------------------------------------------------------------------------------------------------------------------------------------------------------------------------------------------------------------------------------------------------------------------------------------------------------------------------------------------------------------------|-------|-------|-------|--------|--------|---------|----------|-------|---------|--------|-------|-----|-------|
| rs3801805                                                                                                                                                                                                                                                                                                             | 26,897,640                                                                                                                                                               | Transcript                                                                                                                                                                                                                                                                                                                                                                                                                                                                                                                                                                                                                                                              | INTRONIC                                                                                                                                                                                                                                                                                                                                                                                                                                                                                                                                                                                                                                                                                                                                                                                                                                                                                                                                                                                                                                                                                                                                                                                                                                                                                                                                                                                                                                                                                                                                                                                                                                       | 68.28 | 24.80 | 36.92 | 1      | 1      | 44.0918 | 139      | 13991 |         |        |       |     |       |
| rs10486485                                                                                                                                                                                                                                                                                                            | 26,900,356                                                                                                                                                               | Transcript                                                                                                                                                                                                                                                                                                                                                                                                                                                                                                                                                                                                                                                              | INTRONIC                                                                                                                                                                                                                                                                                                                                                                                                                                                                                                                                                                                                                                                                                                                                                                                                                                                                                                                                                                                                                                                                                                                                                                                                                                                                                                                                                                                                                                                                                                                                                                                                                                       | 15.88 | 11.52 | 2.00  |        |        |         | 3849     | 16707 |         |        |       |     |       |
| rs3801803                                                                                                                                                                                                                                                                                                             | 26,901,740                                                                                                                                                               | Transcript                                                                                                                                                                                                                                                                                                                                                                                                                                                                                                                                                                                                                                                              | INTRONIC                                                                                                                                                                                                                                                                                                                                                                                                                                                                                                                                                                                                                                                                                                                                                                                                                                                                                                                                                                                                                                                                                                                                                                                                                                                                                                                                                                                                                                                                                                                                                                                                                                       | 7.24  | 10.28 | 7.12  | 1      | 1      | 37.5219 | 2465     | 18091 |         |        |       |     |       |
| rs73069539                                                                                                                                                                                                                                                                                                            | 26,903,661                                                                                                                                                               | RegulatoryFeature                                                                                                                                                                                                                                                                                                                                                                                                                                                                                                                                                                                                                                                       | REGULATORY                                                                                                                                                                                                                                                                                                                                                                                                                                                                                                                                                                                                                                                                                                                                                                                                                                                                                                                                                                                                                                                                                                                                                                                                                                                                                                                                                                                                                                                                                                                                                                                                                                     | 0.44  | 52.20 | 15.88 | 121.80 | 3      | 0.02    | 4        | 4     | 44.4919 | 544    | 2012  |     |       |
| rs17323934                                                                                                                                                                                                                                                                                                            | 26,904,330                                                                                                                                                               | RegulatoryFeature                                                                                                                                                                                                                                                                                                                                                                                                                                                                                                                                                                                                                                                       | REGULATORY                                                                                                                                                                                                                                                                                                                                                                                                                                                                                                                                                                                                                                                                                                                                                                                                                                                                                                                                                                                                                                                                                                                                                                                                                                                                                                                                                                                                                                                                                                                                                                                                                                     | 1.78  | 15.72 | 4.00  | 30.00  | 52     | 86      | 448.4156 | 33    | 20681   |        |       |     |       |
| H3K9Ac, Histone, Histone 3 Lysine 9 Acetylation<br>H3K9me3, Histone, Histone 3 Lysine 9 Tri-Methylation<br>H3K4me3, Histone, Histone 3 Lysine 4 Tri-Methylation<br>H3K27me3, Histone, Histone 3 Lysine 27 Tri-Methylation<br>H3K27ac, Histone, Histone 3 Lysine 27 Acetylation<br>H2AZ, Histone, Histone 2A variant 2 | H3K9me1, Histone, Histone 3 Lysine 4 Mono-Methylation<br>H3K4me1, Histone, Histone 3 Lysine 4 Mono-Methylation<br>H3K27me3, Histone, Histone 3 Lysine 27 Tri-Methylation | H3K9Ac, Histone, Histone 3 Lysine 9 Acetylation<br>D2F6, Open Chromatin, DNaseI Hypersensitive Site<br>E2F6, Transcription Factor, E2F6 Transcription Factor Binding<br>H3K4me3, Histone, Histone 3 Lysine 4 Tri-Methylation<br>H3K4me3, Histone, Histone 3 Lysine 4 Di-Methylation<br>H3K27me3, Histone, Histone 3 Lysine 27 Tri-Methylation<br>H2AZ, Histone, Histone 2A variant 2<br>H3K36ac, Histone, Histone 3 Lysine 27 Acetylation<br>H3K18Ac, Histone, Histone 3 Lysine 9 Acetylation<br>H3K27ac, Histone, Histone 3 Lysine 27 Acetylation<br>Promoter Associated, Regulatory Feature, Promoter like regulatory feature<br>PoliI, Polymerase, RNA Polymerase II | DNase1, Open Chromatin, DNaseI Hypersensitive Site<br>HEY1, Transcription Factor, HEY1 Transcription Factor Binding<br>H3K4me3, Histone, Histone 3 Lysine 4 Tri-Methylation<br>ELF1, Transcription Factor, ELF1 Transcription Factor Binding<br>H3K27me3, Histone, Histone 3 Lysine 27 Tri-Methylation<br>H3K36ac, Histone, Histone 3 Lysine 36 Acetylation<br>H3K18Ac, Histone, Histone 3 Lysine 9 Acetylation<br>TFAP1, Transcription Factor, TFAP1 Transcription Factor Binding<br>H2AF1, Transcription Factor, H2AF1 Transcription Factor Binding<br>Max, Transcription Factor, Max TF binding<br>PoliI, Polymerase, RNA Polymerase II<br>Cos, Transcription Factor, Cos TF binding<br>H2BK2ac, Histone, Histone 28 Lysine 5 Acetylation<br>H2BK12ac, Histone, Histone 28 Lysine 12 Acetylation<br>H3K9Ac, Histone, Histone 3 Lysine 9 Acetylation<br>FAIRE, Open Chromatin, Formaldehyde-Assisted Isolation of Regulatory Elements<br>ATF3, Transcription Factor, ATF3 Transcription Factor Binding<br>E2F6, Transcription Factor, E2F6 Transcription Factor Binding<br>Yy1, Transcription Factor, Yy1 Transcription Factor Binding<br>Ap2gamma, Transcription Factor, Ap2gamma Transcription Factor Binding<br>USF1, Transcription Factor, USF1 Transcription Factor Binding<br>FOSL2, Transcription Factor, FOSL2 Transcription Factor Binding<br>H3K4me3, Histone, Histone 3 Lysine 4 Tri-Methylation<br>H3K27me3, Histone, Histone 3 Lysine 27 Tri-Methylation<br>H2AZ, Histone, Histone 2A variant 2<br>H3K9Ac, Histone, Histone 3 Lysine 9 Acetylation<br>Promoter Associated, Regulatory Feature, Promoter like regulatory feature |       |       |       |        |        |         |          |       |         |        |       |     |       |



#abbreviation description

## Epigenome IDs

| Epigenome ID (EID) | Group          | Mnemonic                   | Description                                                    |
|--------------------|----------------|----------------------------|----------------------------------------------------------------|
| E017               | IMR90          | LNG.IMR90                  | IMR90 fetal lung fibroblasts Cell Line                         |
| E002               | ESC            | ESC.WA7                    | ES-WA7 Cells                                                   |
| E008               | ESC            | ESC.H9                     | H9 Cells                                                       |
| E001               | ESC            | ESC.I3                     | ES-I3 Cells                                                    |
| E015               | ESC            | ESC.HUES6                  | HUES6 Cells                                                    |
| E014               | ESC            | ESC.HUES48                 | HUES48 Cells                                                   |
| E016               | ESC            | ESC.HUES64                 | HUES64 Cells                                                   |
| E003               | ESC            | ESC.H1                     | H1 Cells                                                       |
| E024               | ESC            | ESC.4STAR                  | ES-UCSF4 Cells                                                 |
| E020               | iPSC           | IPSC.20B                   | iPS-20b Cells                                                  |
| E019               | iPSC           | IPSC.18                    | iPS-18 Cells                                                   |
| E018               | iPSC           | IPSC.15b                   | iPS-15b Cells                                                  |
| E021               | iPSC           | IPSC.DF.6.9                | iPS DF 6.9 Cells                                               |
| E022               | iPSC           | IPSC.DF.19.11              | iPS DF 19.11 Cells                                             |
| E007               | ES-deriv       | ESDR.H1.NEUR.PROG          | H1 Derived Neuronal Progenitor Cultured Cells                  |
| E009               | ES-deriv       | ESDR.H9.NEUR.PROG          | H9 Derived Neuronal Progenitor Cultured Cells                  |
| E010               | ES-deriv       | ESDR.H9.NEUR               | H9 Derived Neuron Cultured Cells                               |
| E013               | ES-deriv       | ESDR.CD56.MESO             | hESC Derived CD56+ Mesoderm Cultured Cells                     |
| E012               | ES-deriv       | ESDR.CD56.ECTO             | hESC Derived CD56+ Ectoderm Cultured Cells                     |
| E011               | ES-deriv       | ESDR.CD184.ENDO            | hESC Derived CD184+ Endoderm Cultured Cells                    |
| E004               | ES-deriv       | ESDR.H1.BMP4.MESO          | H1 BMP4 Derived Mesendoderm Cultured Cells                     |
| E005               | ES-deriv       | ESDR.H1.BMP4.TROP          | H1 BMP4 Derived Trophoblast Cultured Cells                     |
| E006               | ES-deriv       | ESDR.H1.MSC                | H1 Derived Mesenchymal Stem Cells                              |
| E062               | Blood & T-cell | BLD.PER.MONUC.PC           | Primary mononuclear cells from peripheral blood                |
| E034               | Blood & T-cell | BLD.CD3.PPC                | Primary T cells from peripheral blood                          |
| E045               | Blood & T-cell | BLD.CD4.CD25I.CD127.TMEMPC | Primary T cells effector/memory enriched from peripheral blood |
| E033               | Blood & T-cell | BLD.CD3.CPC                | Primary T cells from cord blood                                |
| E044               | Blood & T-cell | BLD.CD4.CD25.CD127M.TREGPC | Primary T regulatory cells from peripheral blood               |
| E043               | Blood & T-cell | BLD.CD4.CD25M.TPC          | Primary T helper cells from peripheral blood                   |
| E039               | Blood & T-cell | BLD.CD4.CD25M.CD45RA.NPC   | Primary T helper naive cells from peripheral blood             |
| E041               | Blood & T-cell | BLD.CD4.CD25M.IL17M.PL.TPC | Primary T helper cells PMA-I stimulated                        |
| E042               | Blood & T-cell | BLD.CD4.CD25M.IL17P.PL.TPC | Primary T helper 17 cells PMA-I stimulated                     |
| E040               | Blood & T-cell | BLD.CD4.CD25M.CD45RO.MPC   | Primary T helper memory cells from peripheral blood 1          |
| E037               | Blood & T-cell | BLD.CD4.MPC                | Primary T helper memory cells from peripheral blood 2          |
| E048               | Blood & T-cell | BLD.CD8.MPC                | Primary T CD8+ memory cells from peripheral blood              |
| E038               | Blood & T-cell | BLD.CD4.NPC                | Primary T helper naive cells from peripheral blood             |
| E047               | Blood & T-cell | BLD.CD8.NPC                | Primary T CD8+ naive cells from peripheral blood               |
| E029               | HSC & B-cell   | BLD.CD14.PC                | Primary monocytes from peripheral blood                        |
| E031               | HSC & B-cell   | BLD.CD19.CPC               | Primary B cells from cord blood                                |
| E035               | HSC & B-cell   | BLD.CD34.PC                | Primary hematopoietic stem cells                               |
| E051               | HSC & B-cell   | BLD.MOB.CD34.PC.M          | Primary hematopoietic stem cells G-CSF-mobilized Male          |
| E050               | HSC & B-cell   | BLD.MOB.CD34.PC.F          | Primary hematopoietic stem cells G-CSF-mobilized Female        |
| E036               | HSC & B-cell   | BLD.CD34.CC                | Primary hematopoietic stem cells short term culture            |
| E032               | HSC & B-cell   | BLD.CD19.PPC               | Primary B cells from peripheral blood                          |
| E046               | HSC & B-cell   | BLD.CD56.PC                | Primary Natural Killer cells from peripheral blood             |
| E030               | HSC & B-cell   | BLD.CD15.PC                | Primary neutrophils from peripheral blood                      |
| E026               | Mesench        | STRM.MRW.MSC               | Bone Marrow Derived Cultured Mesenchymal Stem Cells            |
| E049               | Mesench        | STRM.CHON.MRW.DR.MSC       | Mesenchymal Stem Cell Derived Chondrocyte Cultured Cells       |
| E025               | Mesench        | FAT.ADIP.DR.MSC            | Adipose Derived Mesenchymal Stem Cell Cultured Cells           |
| E023               | Mesench        | FAT.MSC.DR.ADIP            | Mesenchymal Stem Cell Derived Adipocyte Cultured Cells         |
| E052               | Myosat         | MUS.SAT                    | Muscle Satellite Cultured Cells                                |
| E055               | Epithelial     | SKIN.PEN.FRSK.FIB.01       | Foreskin Fibroblast Primary Cells skin01                       |
| E056               | Epithelial     | SKIN.PEN.FRSK.FIB.02       | Foreskin Fibroblast Primary Cells skin02                       |
| E059               | Epithelial     | SKIN.PEN.FRSK.MEL.01       | Foreskin Melanocyte Primary Cells skin01                       |
| E061               | Epithelial     | SKIN.PEN.FRSK.MEL.03       | Foreskin Melanocyte Primary Cells skin03                       |
| E057               | Epithelial     | SKIN.PEN.FRSK.KER.02       | Foreskin Keratinocyte Primary Cells skin02                     |
| E058               | Epithelial     | SKIN.PEN.FRSK.KER.03       | Foreskin Keratinocyte Primary Cells skin03                     |
| E028               | Epithelial     | BRST.HMEC.35               | Breast variant Human Mammary Epithelial Cells (vHMEC)          |
| E027               | Epithelial     | BRST.MYO                   | Breast Myoepithelial Primary Cells                             |
| E054               | Neurosph       | BRN.GANGEM.DR.NRSPHR       | Ganglion Eminence derived primary cultured neurospheres        |
| E053               | Neurosph       | BRN.CRTX.DR.NRSPHR         | Cortex derived primary cultured neurospheres                   |
| E112               | Thymus         | THYM                       | Thymus                                                         |
| E093               | Thymus         | THYM.FET                   | Fetal Thymus                                                   |



|      |            |                       |                                                  |
|------|------------|-----------------------|--------------------------------------------------|
| E071 | Brain      | BRN.HIPP.MID          | Brain Hippocampus Middle                         |
| E074 | Brain      | BRN.SUB.NIG           | Brain Substantia Nigra                           |
| E068 | Brain      | BRN.ANT.CAUD          | Brain Anterior Caudate                           |
| E069 | Brain      | BRN.CING.GYR          | Brain Cingulate Gyrus                            |
| E072 | Brain      | BRN.INF.TMP           | Brain Inferior Temporal Lobe                     |
| E067 | Brain      | BRN.ANG.GYR           | Brain Angular Gyrus                              |
| E073 | Brain      | BRN.DL.PRFRTL.CRTX    | Brain_Dorsolateral_Prefrontal_Cortex             |
| E070 | Brain      | BRN.GRM.MTRX          | Brain Germinal Matrix                            |
| E082 | Brain      | BRN.FET.F             | Fetal Brain Female                               |
| E081 | Brain      | BRN.FET.M             | Fetal Brain Male                                 |
| E063 | Adipose    | FAT.ADIP.NUC          | Adipose Nuclei                                   |
| E100 | Muscle     | MUS.PSOAS             | Psoas Muscle                                     |
| E108 | Muscle     | MUS.SKLT.F            | Skeletal Muscle Female                           |
| E107 | Muscle     | MUS.SKLT.M            | Skeletal Muscle Male                             |
| E089 | Muscle     | MUS.TRNK.FET          | Fetal Muscle Trunk                               |
| E090 | Muscle     | MUS.LEG.FET           | Fetal Muscle Leg                                 |
| E083 | Heart      | HRT.FET               | Fetal Heart                                      |
| E104 | Heart      | HRT.ATR.R             | Right Atrium                                     |
| E095 | Heart      | HRT.VENT.L            | Left Ventricle                                   |
| E105 | Heart      | HRT.VNT.R             | Right Ventricle                                  |
| E065 | Heart      | VAS.AOR               | Aorta                                            |
| E078 | Sm. Muscle | GI.DUO.SM.MUS         | Duodenum Smooth Muscle                           |
| E076 | Sm. Muscle | GI.CLN.SM.MUS         | Colon Smooth Muscle                              |
| E103 | Sm. Muscle | GI.RECT.SM.MUS        | Rectal Smooth Muscle                             |
| E111 | Sm. Muscle | GI.STMC.MUS           | Stomach Smooth Muscle                            |
| E092 | Digestive  | GI.STMC.FET           | Fetal Stomach                                    |
| E085 | Digestive  | GI.S.INT.FET          | Fetal Intestine Small                            |
| E084 | Digestive  | GI.L.INT.FET          | Fetal Intestine Large                            |
| E109 | Digestive  | GI.S.INT              | Small Intestine                                  |
| E106 | Digestive  | GI.CLN.SIG            | Sigmoid Colon                                    |
| E075 | Digestive  | GI.CLN.MUC            | Colonic Mucosa                                   |
| E101 | Digestive  | GI.RECT.MUC.29        | Rectal Mucosa Donor 29                           |
| E102 | Digestive  | GI.RECT.MUC.31        | Rectal Mucosa Donor 31                           |
| E110 | Digestive  | GI.STMC.MUC           | Stomach Mucosa                                   |
| E077 | Digestive  | GI.DUO.MUC            | Duodenum Mucosa                                  |
| E079 | Digestive  | GI.ESO                | Esophagus                                        |
| E094 | Digestive  | GI.STMC.GAST          | Gastric                                          |
| E099 | Other      | PLCNT.AMN             | Placenta Amnion                                  |
| E086 | Other      | KID.FET               | Fetal Kidney                                     |
| E088 | Other      | LNG.FET               | Fetal Lung                                       |
| E097 | Other      | OVRV                  | Ovary                                            |
| E087 | Other      | PANC.ISLT             | Pancreatic Islets                                |
| E080 | Other      | ADRL.GLND.FET         | Fetal Adrenal Gland                              |
| E091 | Other      | PLCNT.FET             | Placenta                                         |
| E066 | Other      | LIV.ADLT              | Liver                                            |
| E098 | Other      | PANC                  | Pancreas                                         |
| E096 | Other      | LNG                   | Lung                                             |
| E113 | Other      | SPLN                  | Spleen                                           |
| E114 | ENCODE2012 | LNG.A549.ETOHO02.CNCR | A549 EtOH 0.02pct Lung Carcinoma Cell Line       |
| E115 | ENCODE2012 | BLD.DND41.CNCR        | Dnd41 TCell Leukemia Cell Line                   |
| E116 | ENCODE2012 | BLD.GM12878           | GM12878 Lymphoblastoid Cells                     |
| E117 | ENCODE2012 | CRVX.HELAS3.CNCR      | HeLa-S3 Cervical Carcinoma Cell Line             |
| E118 | ENCODE2012 | LIV.HEPG2.CNCR        | HepG2 Hepatocellular Carcinoma Cell Line         |
| E119 | ENCODE2012 | BRST.HMEC             | HMEC Mammary Epithelial Primary Cells            |
| E120 | ENCODE2012 | MUS.HSMM              | HSMM Skeletal Muscle Myoblasts Cells             |
| E121 | ENCODE2012 | MUS.HSMMT             | HSMM cell derived Skeletal Muscle Myotubes Cells |
| E122 | ENCODE2012 | VAS.HUVEC             | HUVEC Umbilical Vein Endothelial Primary Cells   |
| E123 | ENCODE2012 | BLD.K562.CNCR         | K562 Leukemia Cells                              |
| E124 | ENCODE2012 | BLD.CD14.MONO         | Monocytes-CD14+ RO01746 Primary Cells            |
| E125 | ENCODE2012 | BRN.NHA               | NH-A Astrocytes Primary Cells                    |
| E126 | ENCODE2012 | SKIN.NHDFAD           | NHDF-Ad Adult Dermal Fibroblast Primary Cells    |
| E127 | ENCODE2012 | SKIN.NHEK             | NHEK-Epidermal Keratinocyte Primary Cells        |
| E128 | ENCODE2012 | LNG.NHLF              | NHLF Lung Fibroblast Primary Cells               |
| E129 | ENCODE2012 | BONE.OSTEO            | Osteoblast Primary Cells                         |



**chromatin core models**

**Core 15-state model (5 marks, 127 epigenomes)**

| State No | Mnemonic | Description                |
|----------|----------|----------------------------|
| 1        | TssA     | Active TSS                 |
| 2        | TssAFlnk | Flanking Active TSS        |
| 3        | TxFlnk   | Transcr. at gene 5' and 3' |
| 4        | Tx       | Strong transcription       |
| 5        | TxWk     | Weak transcription         |
| 6        | EnhG     | Genic enhancers            |
| 7        | Enh      | Enhancers                  |
| 8        | ZNF/Rpts | ZNF genes & repeats        |
| 9        | Het      | Heterochromatin            |
| 10       | TssBiv   | Bivalent/Poised TSS        |
| 11       | BivFlnk  | Flanking Bivalent TSS/Enh  |
| 12       | EnhBiv   | Bivalent Enhancer          |
| 13       | ReprPC   | Repressed PolyComb         |
| 14       | ReprPCWk | Weak Repressed PolyComb    |
| 15       | Quies    | Quiescent/Low              |

**Chromatin state model based on imputed data (25 state, 12 marks, 127 epigenomes)**

| State No | Mnemonic | Description                         |
|----------|----------|-------------------------------------|
| 1        | TssA     | Active TSS                          |
| 2        | PromU    | Promoter Upstream TSS               |
| 3        | PromD1   | Promoter Downstream TSS 1           |
| 4        | PromD2   | Promoter Downstream TSS 2           |
| 5        | Tx5'     | Transcribed - 5' preferential       |
| 6        | Tx       | Strong transcription                |
| 7        | Tx3'     | Transcribed - 3' preferential       |
| 8        | TxWk     | Weak transcription                  |
| 9        | TxReg    | Transcribed & regulatory (Prom/Enh) |
| 10       | TxEnh5'  | Transcribed 5' preferential and Enh |
| 11       | TxEnh3'  | Transcribed 3' preferential and Enh |
| 12       | TxEnhW   | Transcribed and Weak Enhancer       |
| 13       | EnhA1    | Active Enhancer 1                   |
| 14       | EnhA2    | Active Enhancer 2                   |
| 15       | EnhAF    | Active Enhancer Flank               |
| 16       | EnhW1    | Weak Enhancer 1                     |
| 17       | EnhW2    | Weak Enhancer 2                     |
| 18       | EnhAc    | Primary H3K27ac possible Enhancer   |
| 19       | DNase    | Primary DNase                       |
| 20       | ZNF/Rpts | ZNF genes & repeats                 |
| 21       | Het      | Heterochromatin                     |
| 22       | PromP    | Poised Promoter                     |
| 23       | PromBiv  | Bivalent Promoter                   |
| 24       | ReprPC   | Repressed Polycomb                  |
| 25       | Quies    | Quiescent/Low                       |

**SNP:** SNP rs ID; **CHR:** Chromosome; **BP:** position (NCBI build 37/hg19 coordinates) of SNP marker; **AnnoType:** ‘CodingTranscript’, ‘Intergenic’, ‘MotifFeature’, ‘NonCodingTranscript’, ‘RegulatoryFeature’, ‘Transcript’; **Consequence:** ‘3PRIME\_UTR’, ‘5PRIME\_UTR’, ‘DOWNSTREAM’, ‘INTERGENIC’, ‘INTRONIC’, ‘NON\_SYNONYMOUS’, ‘SYNONYMOUS’, ‘REGULATORY’, ‘STOP\_GAINED’, ‘STOP\_LOST’, ‘SPLICE\_SITE’, ‘CANONCAL\_SPLICE’, ‘UPSTREAM’, ‘NONCODING\_CHANGE’; **EncExp:** maximum ENCODE expression value; **EncH3K27Ac:** maximum ENCODE H3K27 acetylation level; **EncH3K4Me1:** maximum ENCODE H3K4 methylation level; **EncH3K4Me3:** maximum ENCODE H3K4 trimethylation level; **tOverlapMotifs:** number of overlapping predicted transcription factor motifs; **motifDist:** Reference minus alternate allele difference in nucleotide frequency within an predicted overlapping motif; **TFBS:** number of different overlapping Chromatin immunoprecipitation (ChIP) transcription factor binding sites; **TFBSPeaks:** number of overlapping ChIP transcription factor binding site peaks summed over different cell types/tissue; **TFBSPeaksMax:** maximum value of overlapping ChIP transcription factor binding site peaks across cell types/tissue; **minDistTSS:** distance to closest transcribed sequence start (TSS); **minDistTSE:** distance to closest transcribed sequence end (TSE); **regulatory features:** regulatory features from the Ensembl Regulation database, e.g. histone modification sites, open chromatin or transcription factor binding sites); **Chromatin States:** chromatin 15-state core model learned on five core chromatin marks: shown are the ‘Epigenome ID’ and the predicted chromatin state (state number and mnemonic); **Chromatin States Imputed:** chromatin 25-state core model learned on 12 core chromatin marks: shown are the ‘Epigenome ID’ and the predicted chromatin state (state number and mnemonic); **Chromatin Marks:** shown are the ‘Epigenome ID’ and the chromatin marks H3K4me1 and H3K27ac as enhancers and H3K4me3 and H3K9ac as promoters; **Promoter histone marks:** cell type/tissue in which promoter chromatin mark was found; **Enhancer histone marks:** cell type/tissue in which enhancer chromatin mark was found; **DNase:** ‘Epigenome ID’ in which DNase hypersensitivity site was found; **Proteins bound by ChIP (ENCODE):** DNA-associated proteins identified through ChIP-sequencing by the ENCODE<sup>6</sup> project; **Regulatory motifs altered:** shown are regulatory motifs altered by the variant.

**Supplementary Table 9. Prevalence of different CVD grades in the study population (panel A-C, see Supplementary Table 1) according to the CEAP classification.**

| <b>CVD grade</b> | <b>Total (n=2,269)</b> | <b>Males (n=641; 28.3%)</b> | <b>Females (n=1,628; 71.7%)</b> |
|------------------|------------------------|-----------------------------|---------------------------------|
| C2               | 383 (16.9%)            | 85 (13.3%)                  | 298 (18.3%)                     |
| C3               | 1,488 (65.6%)          | 378 (59.0%)                 | 1110 (68.2%)                    |
| C4               | 398 (17.5%)            | 178 (27.8%)                 | 220 (13.5%)                     |

**Supplementary Table 10. Characteristics of medical history of CVD patients (panel A-C, Supplementary Table 1).**

|                      | <b>All patients (n=2,269)</b> | <b>SD (range)</b>  | <b>Males (n=641)</b> | <b>SD (range)</b>  | <b>Females (n=1,628)</b> | <b>SD (range)</b>  |
|----------------------|-------------------------------|--------------------|----------------------|--------------------|--------------------------|--------------------|
| Age at ascertainment | 55.4 years                    | 11.1 years (21-82) | 55.3 years           | 11.6 years (22-80) | 55.5 years               | 11.0 years (21-82) |
| Age at onset         | 32.3 years                    | 12.0 years (5-86)  | 36.2 years           | 13.0 years (5-86)  | 30.8 years               | 11.2 years (6-72)  |
| Duration of disease  | 23.1 years                    | 12.9 years (0-75)  | 19.0 years           | 12.0 years (0-59)  | 24.7 years               | 12.9 years (0-75)  |
| BMI                  | 26.7                          | 4.8 (14-66)        | 27.4                 | 3.7 (20-53)        | 26.5                     | 5.1 (14-66)        |

Given are overall and sex-specific means, standard deviations (SD) and ranges. Duration of disease was calculated as the difference between age at onset and age at ascertainment.

**Supplementary Table 11. Personal characteristics of healthy control individuals (panel A-C, Supplementary Table 1).**

|                      | <b>Controls (n=4,374)</b> | <b>SD (range)</b>  | <b>Males (n=2,167)</b> | <b>SD (range)</b>  | <b>Females (n=2,207)</b> | <b>SD (range)</b>  |
|----------------------|---------------------------|--------------------|------------------------|--------------------|--------------------------|--------------------|
| Age at ascertainment | 49.4 years                | 15.9 years (18-90) | 50.2 years             | 15.6 years (18-81) | 48.6 years               | 16.2 years (18-90) |
| BMI*                 | 25.9                      | 4.5 (17-61)        | 26.4                   | 4.0 (17-61)        | 25.4                     | 4.9 (17-58)        |

Given are the overall and sex-specific means, standard deviations (SD) and ranges. Age at ascertainment was available for all controls from the CAU Kiel and PopGen (4,374 controls; panels A-C in **Supplementary Table 1**).

\*BMI was available only for the controls of panel A and B from the CAU Kiel and PopGen (3,153 controls; 1,622 males and 1,531 females).

## Supplementary Figures

**Supplementary Figure 1. Principal component analysis of QCed CVD discovery panel (panel A, Supplementary Table 1).** (a) All GWAS samples are plotted on the first two principal components, colored by cases (Var: cyan) and controls (Con: green), respectively. The outlier detection procedure, as implemented in EIGENSTRAT<sup>7</sup> using default parameters ( $\sigma=6.0$ ,  $\text{maxiter}=5$ ,  $\text{topk}=10$ ), revealed no population outliers. (b) Distribution of cases and controls along the first ten principal components stratified by phenotype. (c) Principal component analysis of combined genetic data from GWAS samples and 26 reference populations from the 1000 Genomes Project (<http://www.internationalgenome.org/category/population/>). GWAS samples (grey crosses) are anchored near the CEU population, with values smaller than the median plus/minus five times the interquartile range ( $\text{median} \pm 5 \times \text{IQR}$ ; red square) of GWAS samples for the first two principal components. Super population code: AFR, African; AMR, Ad Mixed American, EAS, East Asian, EUR, European; SAS, South Asian; Population code: CHB, Han Chinese in Beijing, China; JPT, Japanese in Tokyo, Japan; CHS, Southern Han Chinese; CDX, Chinese Dai in Xishuangbanna, China; KHV, Kinh in Ho Chi Minh City, Vietnam; CEU, Utah Residents (CEPH) with Northern and Western Ancestry; TSI, Toscani in Italia; FIN, Finnish in Finland; GBR, British in England and Scotland; IBS, Iberian Population in Spain; YRI, Yoruba in Ibadan, Nigeria; LWK, Luhya in Webuye, Kenya; GWD, Gambia; MSL, Mende in Sierra Leone; ESN, Esan in Nigeria; ASW, Americans of African Ancestry in SW USA; ACB, African Caribbeans in Barbados; MXL, Mexican Ancestry from Los Angeles USA; PUR, Puerto Ricans from Puerto Rico; CLM, Colombians from Medellin, Colombia; PEL, Peruvians from Lima, Peru; GIH, Gujarati Indian from Houston, Texas; PJI, Punjabi from Lahore, Pakistan; BEB, Bengali from Bangladesh; STU, Sri Lankan Tamil from the UK; ITU, Indian Telugu from the UK.

**(a)**

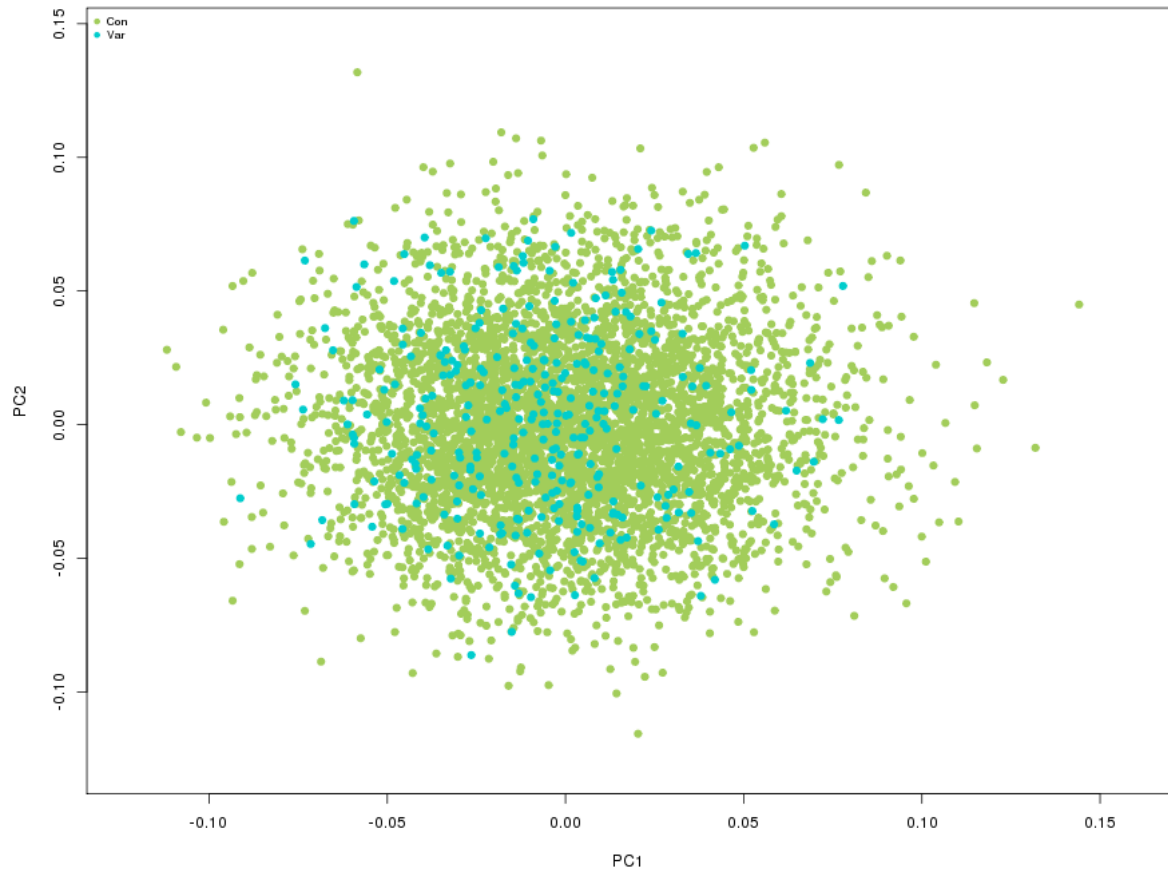

(b)

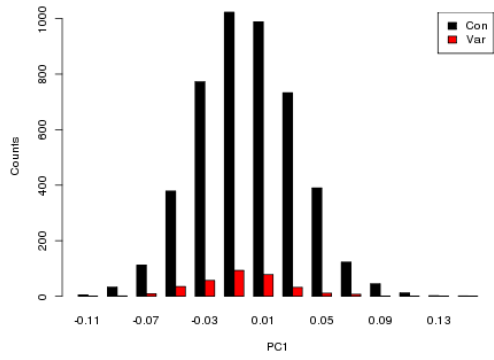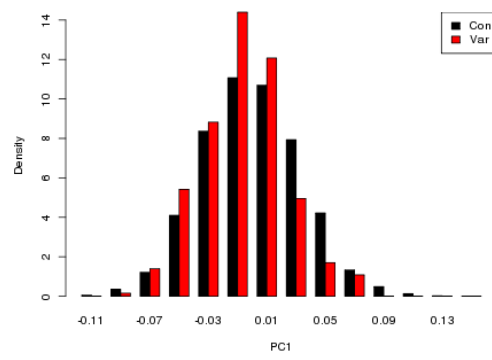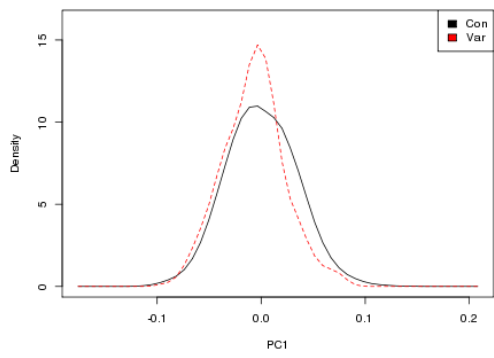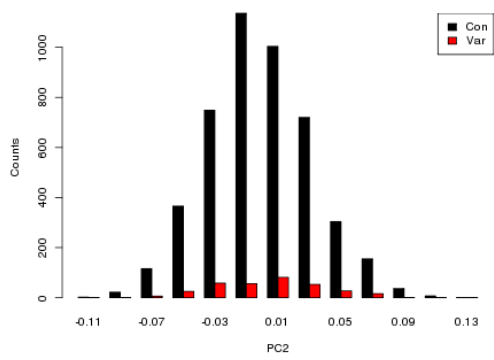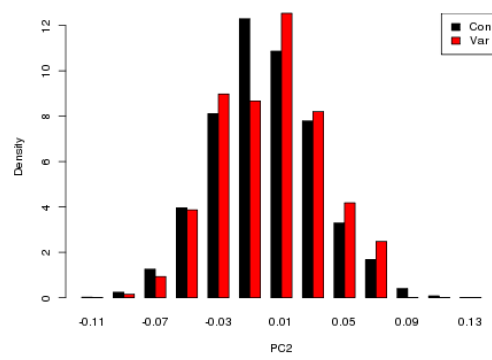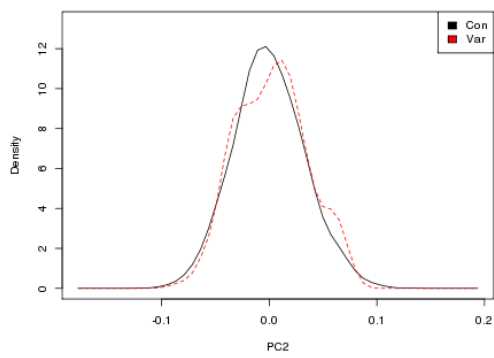



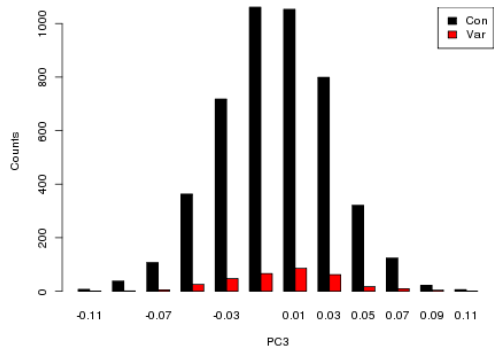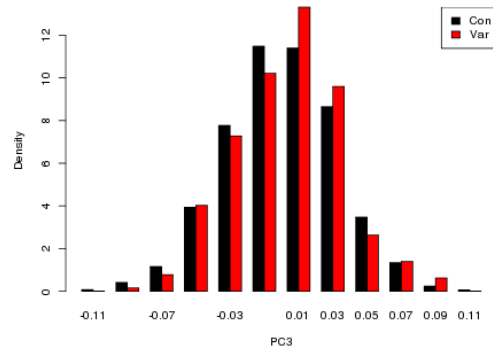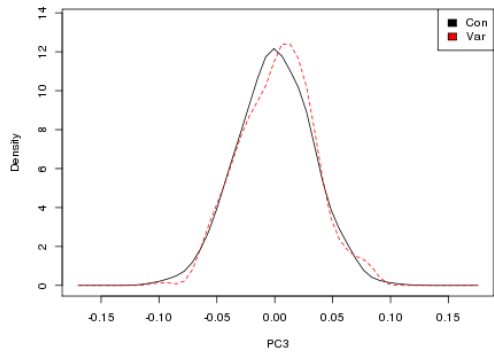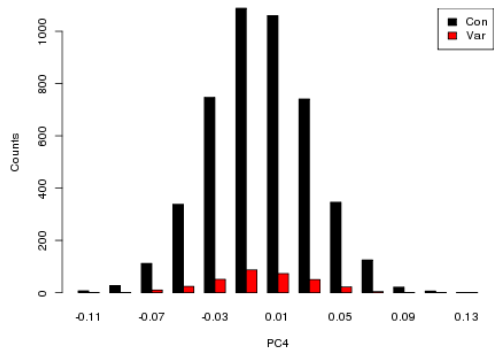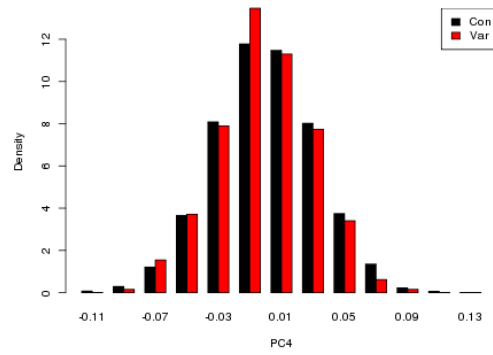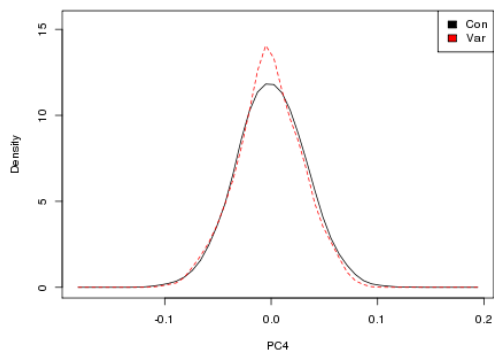

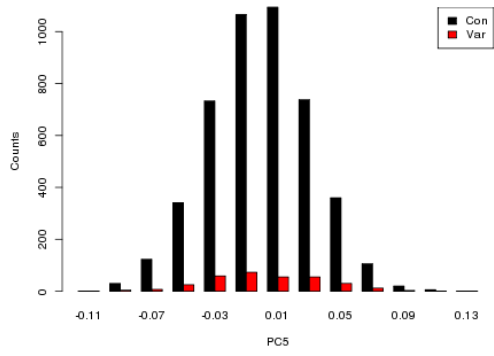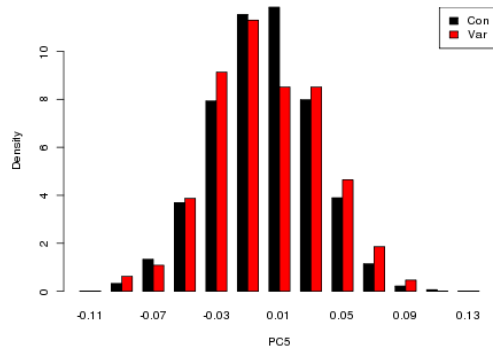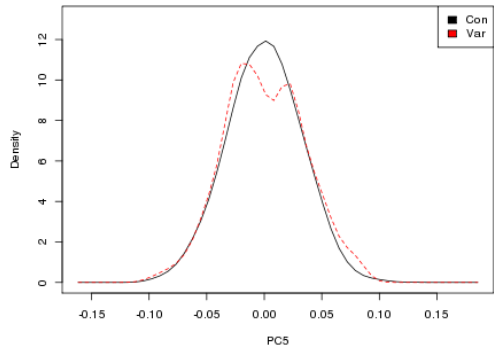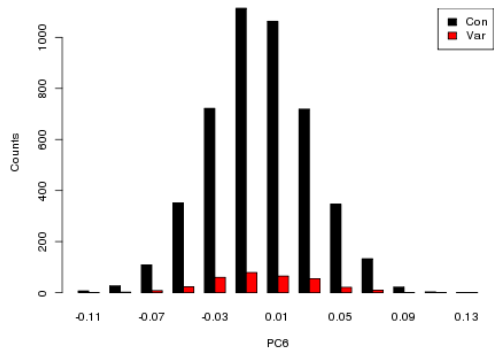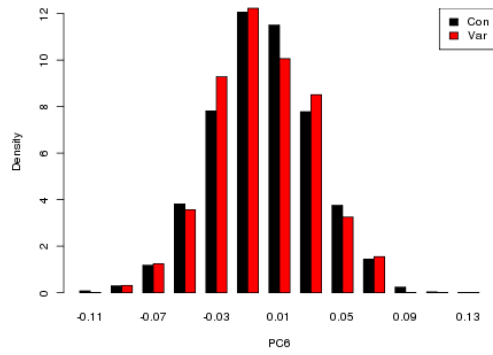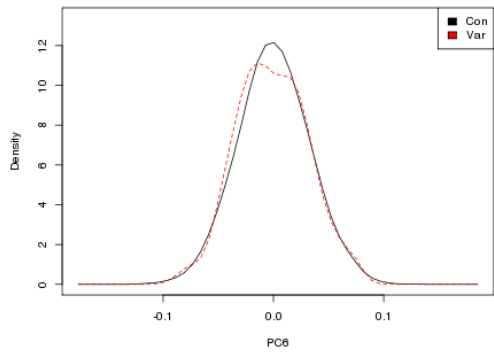

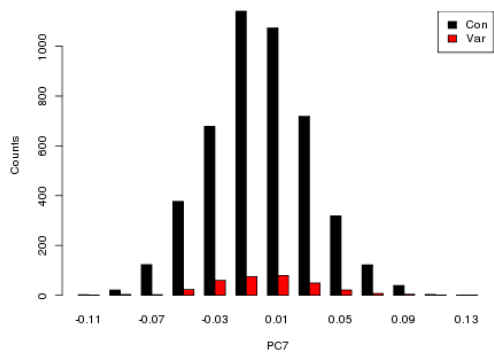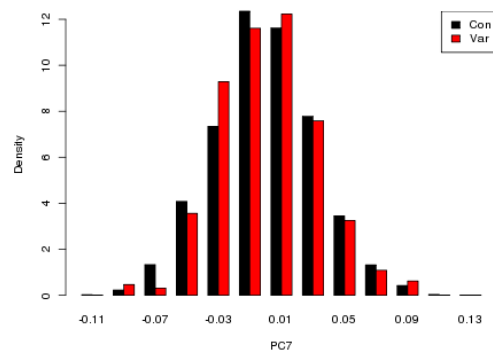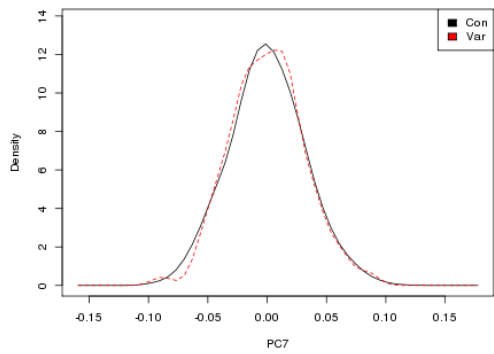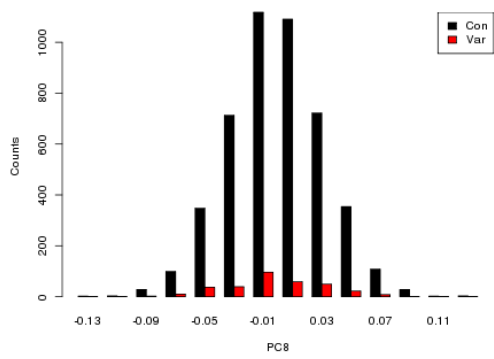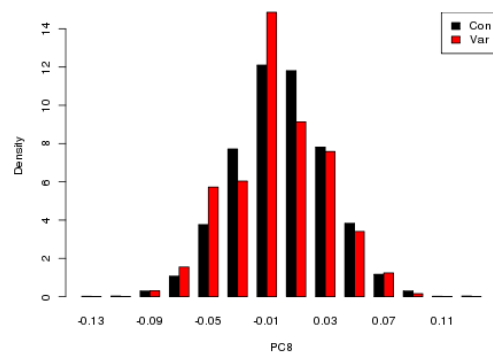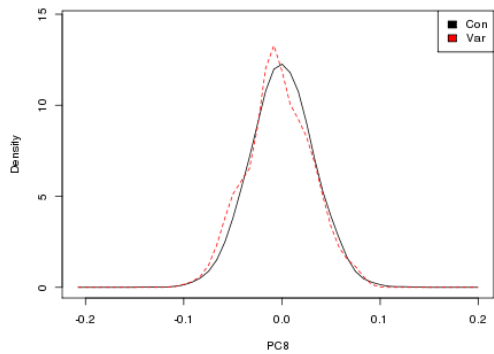

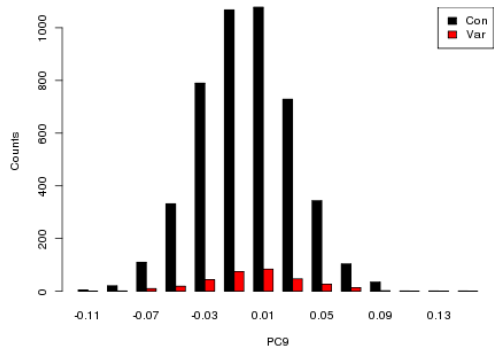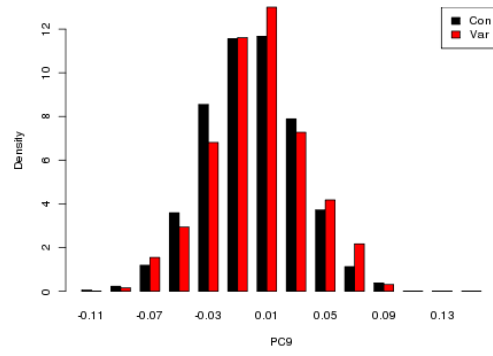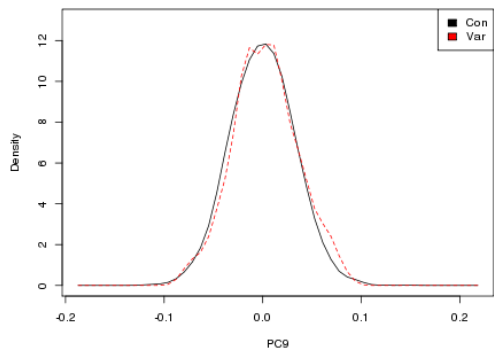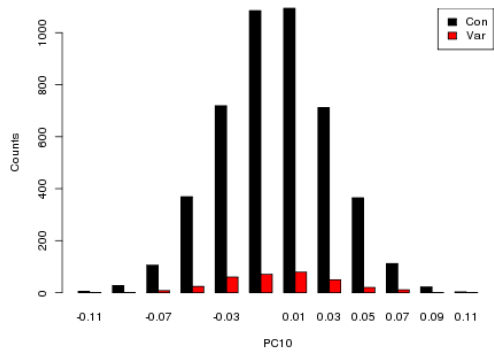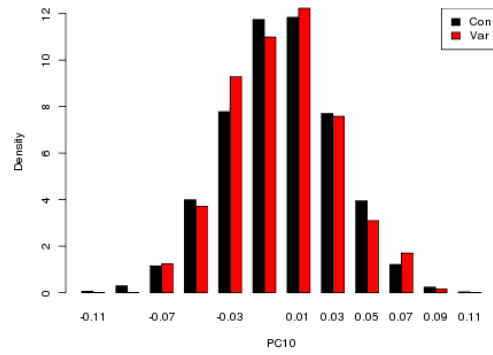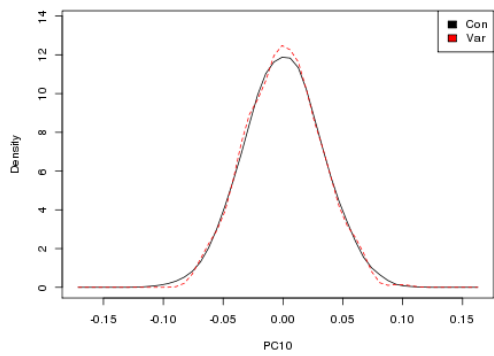

c)

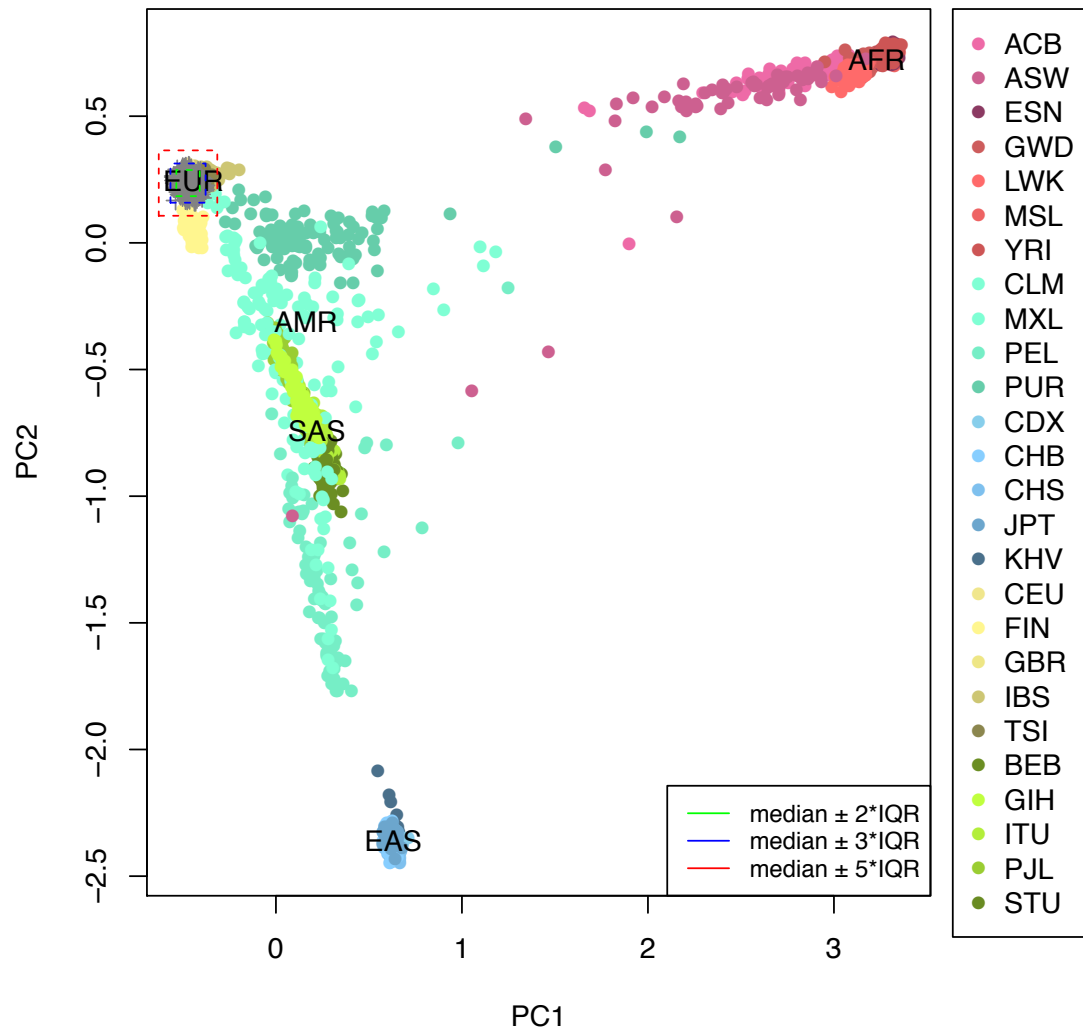

**Supplementary Figure 2. Manhattan plot of association statistics for CVD discovery panel (panel A in Supplementary Table 1).** Red horizontal line indicates the genome-wide significance threshold of  $5 \times 10^{-8}$ . The genome-wide significant locus did not replicate at  $P < 0.05$  in an independent German panel of 1,258 CVD cases and 1,925 control individuals (panel B, **Supplementary Table 1**).

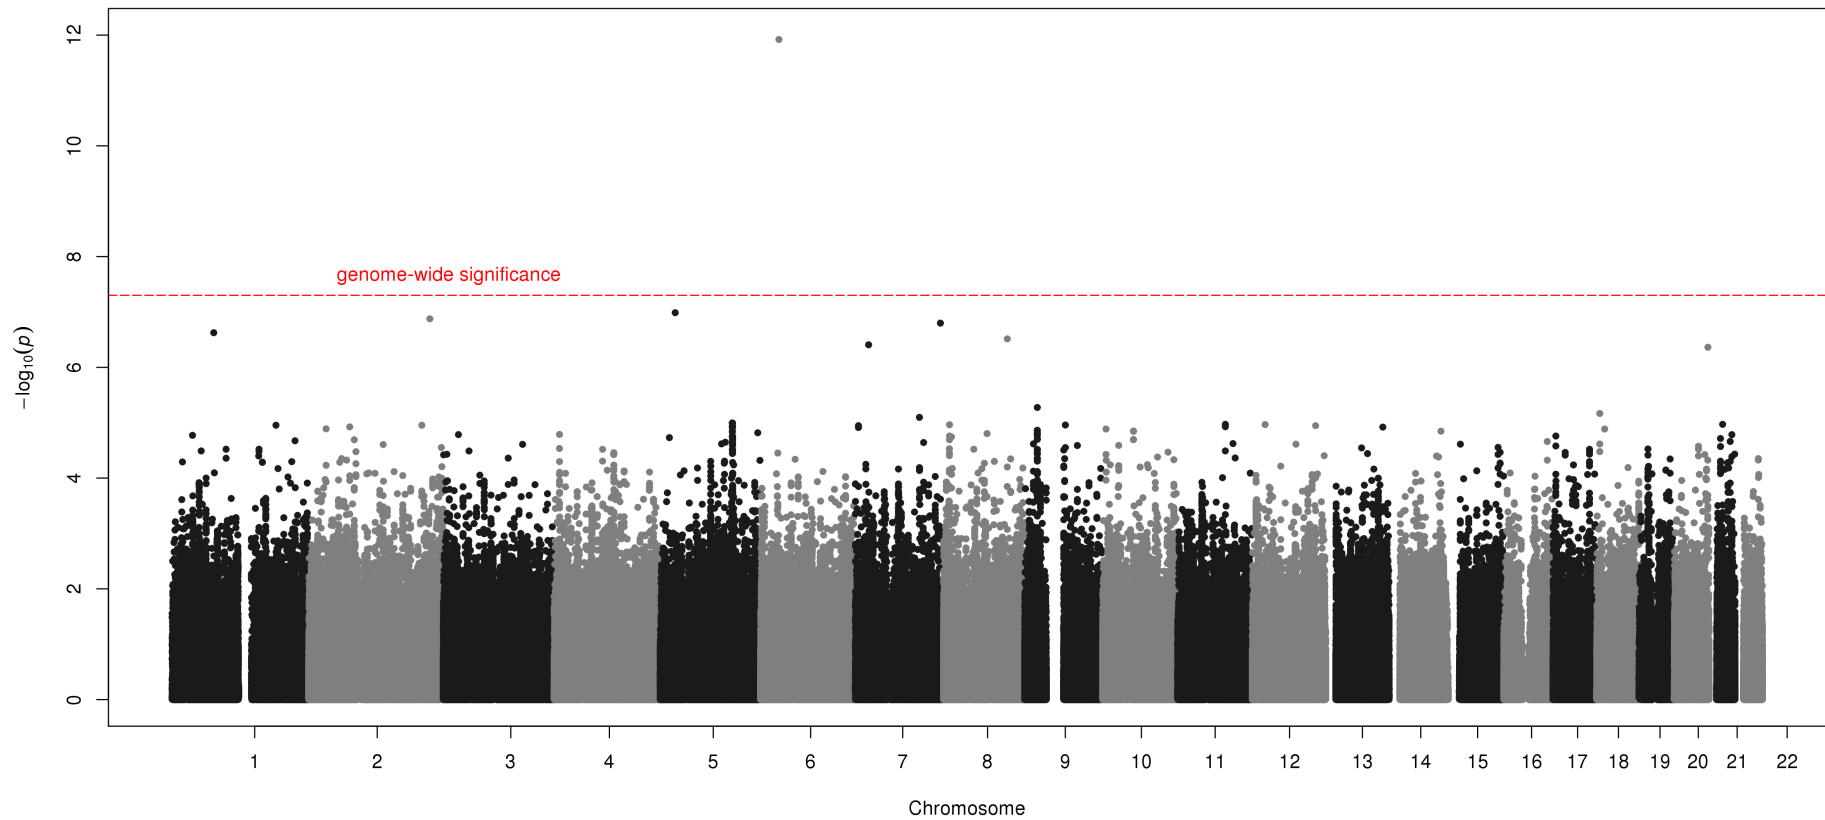

**Supplementary Figure 3. eQTL box plots generated with the GTEx<sup>8</sup> online tool and GTEx analysis release V6. (a)** SNP rs17278665 is a significant eQTL ( $FDR \leq 5\%$ ) for *EFEMP1* with decreased expression associated with the minor allele in sun exposed skin of the lower leg ( $P=2.25 \times 10^{-6}$ ).<sup>8</sup> SNP rs17278665 is also an eQTL for *EFEMP1* in lung tissue ( $P=3.45 \times 10^{-7}$ , no box plot data available from the respective study)<sup>9</sup> (**Supplementary Table 6**). **(b)** SNP rs2030136 is a significant eQTL ( $FDR \leq 5\%$ ) for *HOXA5* with increased expression associated with the minor allele in thyroid tissue ( $P=4.70 \times 10^{-7}$ ).<sup>8</sup> SNP rs2030136 is also an eQTL for *SKAP2* in lymphoblastoid cell lines ( $P=8.30 \times 10^{-9}$ , no box plot data available from the respective study)<sup>10</sup> and whole blood ( $P=4.99 \times 10^{-141}$ , no box plot data available from the respective study)<sup>11</sup> (**Supplementary Table 6**).

**(a)**

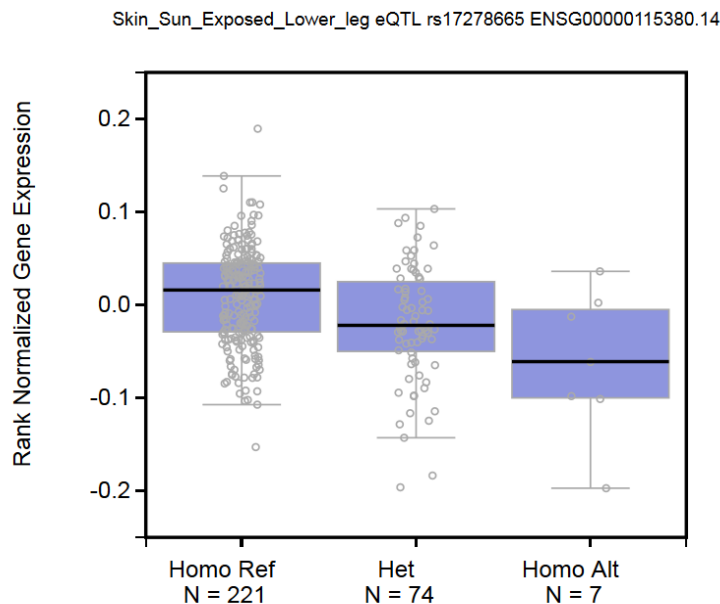

**(b)**

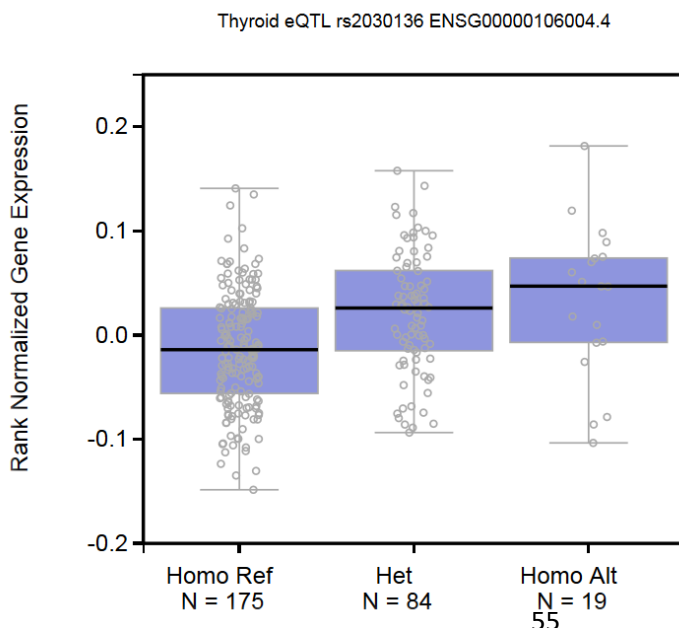

**Supplementary Figure 4. Quantile-quantile (Q-Q) plot for the CVD discovery panel (panel A, Supplementary Table 1).** Only markers that passed the quality criteria were used for plotting. The 2.5th and 97.5th centiles of the distribution under random sampling and the null hypothesis form the 95% concentration band. The genomic inflation factor  $\lambda$  is defined as the ratio of the medians of the sample  $\chi^2$  test statistics and the 1-d.f.  $\chi^2$  distribution  $(0.455)^{12}$ . Since  $\lambda$  inferred from 1,934,349 SNPs showed moderate inflation ( $\lambda=1.156$ ), genomic control correction was applied to results by correction of  $\chi^2$  test statistics using factor  $\lambda$  and multiplying SNP standard errors by the square root of the inflation factor, thus minimizing artificial differences in allele frequencies due to different genotyping platforms.

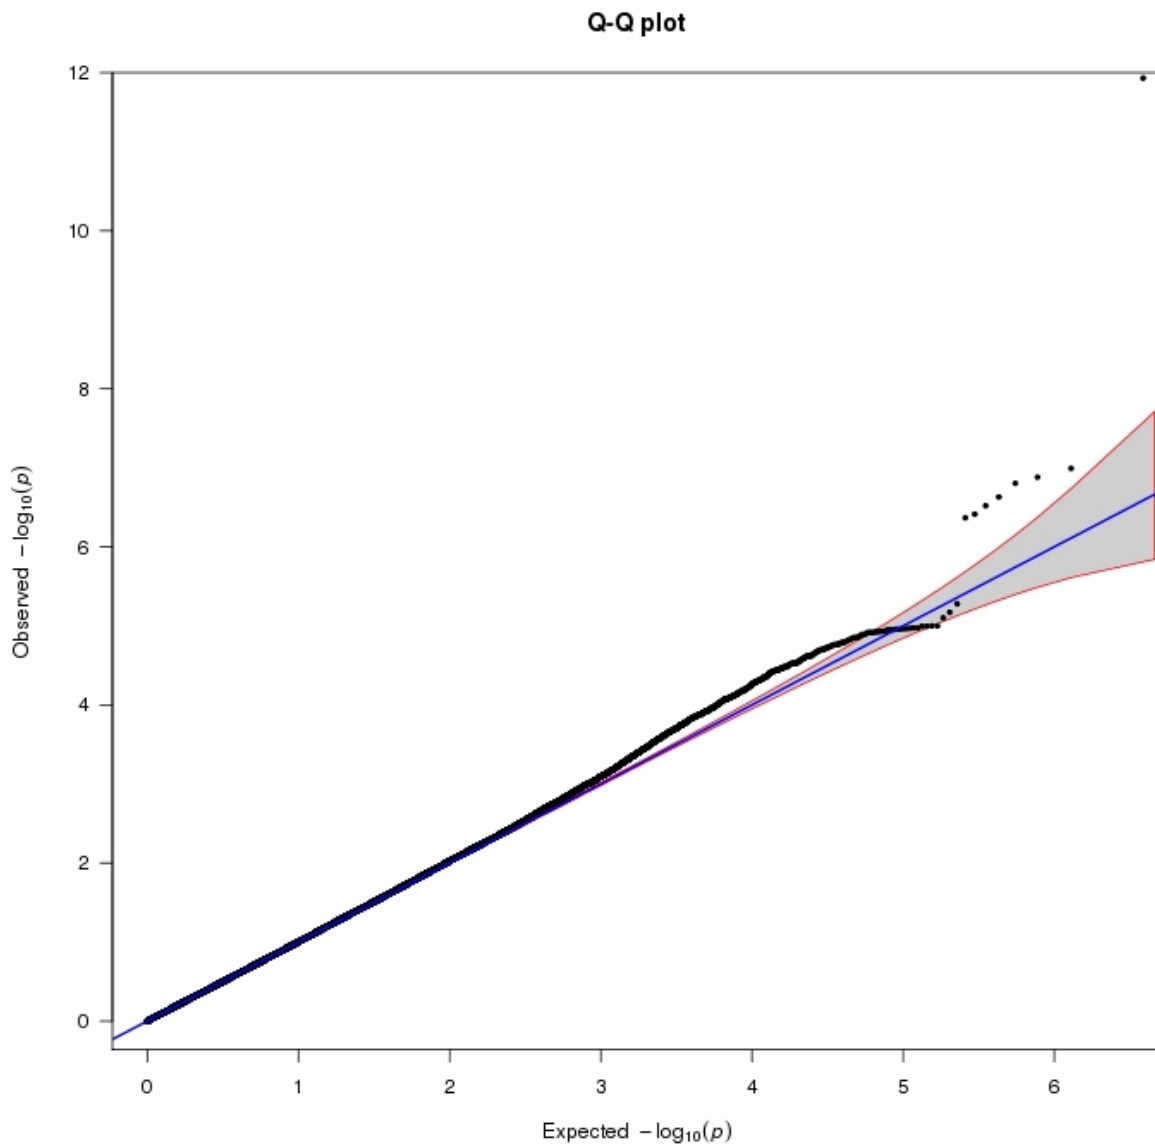



## References

1. Kircher M, Witten DM, Jain P, O’Roak BJ, Cooper GM, Shendure J. A general framework for estimating the relative pathogenicity of human genetic variants. *Nat Genet.* 2014;46:310-5.
2. Shihab HA, Rogers MF, Gough J, Mort M, Cooper DN, Day IN, et al. An integrative approach to predicting the functional effects of non-coding and coding sequence variation. *Bioinformatics.* 2015;31:1536-43.
3. Schwarz JM, Cooper DN, Schuelke M, Seelow D. MutationTaster2: mutation prediction for the deep-sequencing age. *Nat Methods.* 2014;11:361-2.
4. Ward LD, Kellis M. HaploReg: a resource for exploring chromatin states, conservation, and regulatory motif alterations within sets of genetically linked variants. *Nucleic Acids Res.* 2012;40:D930-4.
5. Reese MG, Eeckman FH, Kulp D, Haussler D. Improved splice site detection in Genie. *J Comput Biol.* 1997;4:311-23.
6. Birney E, Stamatoyannopoulos JA, Dutta A, Guigo R, Gingeras TR, Margulies EH, et al. Identification and analysis of functional elements in 1% of the human genome by the ENCODE pilot project. *Nature.* 2007;447:799-816.
7. Price AL, Patterson NJ, Plenge RM, Weinblatt ME, Shadick NA, Reich D. Principal components analysis corrects for stratification in genome-wide association studies. *Nat Genet.* 2006;38:904-9.
8. GTEx-Consortium. Human genomics. The Genotype-Tissue Expression (GTEx) pilot analysis: multitissue gene regulation in humans. *Science.* 2015;348:648-60.
9. Hao K, Bosse Y, Nickle DC, Pare PD, Postma DS, Laviolette M, et al. Lung eQTLs to help reveal the molecular underpinnings of asthma. *PLoS Genet.* 2012;8:e1003029.
10. Lappalainen T, Sammeth M, Friedlander MR, t Hoen PA, Monlong J, Rivas MA, et al. Transcriptome and genome sequencing uncovers functional variation in humans. *Nature.* 2013;501:506-11.
11. Westra HJ, Peters MJ, Esko T, Yaghootkar H, Schurmann C, Kettunen J, et al. Systematic identification of trans eQTLs as putative drivers of known disease associations. *Nat Genet.* 2013;45:1238-43.
12. Devlin B, Roeder K. Genomic control for association studies. *Biometrics.* 1999;55:997-1004.
